1 ***Brettanomyces bruxellensis* wine isolates show high geographical dispersal and**  
2 **long remanence in cellars**

3

4 **Alice Cibrario<sup>1</sup>, Marta Avramova<sup>1</sup>, Maria Dimopoulou<sup>1,2</sup>, Maura Magani<sup>1</sup>, Cécile Miot-**  
5 **Sertier<sup>1</sup>, Albert Mas<sup>3</sup>, Maria C. Portillo<sup>3</sup>, Patricia Ballestra<sup>1</sup>, Warren Albertin<sup>1,4\*</sup>,**  
6 **Isabelle Masneuf-Pomarede<sup>1,5</sup>, Marguerite Dols-Lafargue<sup>1,4</sup>**

7

8 <sup>1</sup>Univ. Bordeaux, ISVV, Unité de recherche Œnologie EA 4577, USC 1366 INRA, Bordeaux  
9 INP, 33140 Villenave d'Ornon, France

10 <sup>2</sup>Department of Food Science and Technology, Faculty of Agriculture, Forestry and Natural  
11 Environments, Aristotle University of Thessaloniki, 541 24 Thessaloniki, Greece

12 <sup>3</sup>Bioteconología Enológica. Dept. Bioquímica i Biotecnologia, Facultat d'Enologia. Universitat  
13 Rovira i Virgili. C/ Marcel·lí Domingo 1. 43007, Tarragona, Spain

14 <sup>4</sup>ENSCBP, Bordeaux INP, 33600 Pessac, France

15 <sup>5</sup>Bordeaux Sciences Agro, 33170 Gradignan, France

16

17 **\* Corresponding author**

18 **Email:** [warren.albertin@u-bordeaux.fr](mailto:warren.albertin@u-bordeaux.fr) (WA)

19

20 **Short title:** Wine *B. bruxellensis* temporal and geographic dispersion

21 **Keywords:** *Brettanomyces bruxellensis*, wine, microsatellite, dispersal, remanence, triploid

## 22 **Abstract**

23 *Brettanomyces bruxellensis* is the main wine spoiler yeast all over the world, yet the structuration of  
24 the populations associated with winemaking remains elusive. In this work, we considered 1411 wine  
25 isolates from 21 countries that were genotyped using twelve microsatellite markers. We confirmed that  
26 *B. bruxellensis* isolates from wine environments show high genetic diversity, with 58 and 42% of  
27 triploid and diploid individuals respectively distributed in 5 main genetic groups. The distribution in  
28 the genetic groups varied greatly depending on the country and/or the wine-producing region.  
29 However, the two wine triploid groups showing sulfite resistance/tolerance were identified in almost  
30 all regions/countries. Genetically identical isolates were also identified. The analysis of these clone  
31 groups revealed that a given genotype could be isolated repeatedly in the same winery over decades,  
32 demonstrating unsuspected remanence ability. Besides cellar residency, a great geographic dispersal  
33 was also evidenced, with some genotypes isolated in wines from different continents. Finally, the  
34 study of old isolates and/or isolates from old vintages revealed that only the diploid groups were  
35 identified prior 1990 vintages. The triploid groups were identified in subsequent vintages, and their  
36 proportion has increased steadily these last decades, suggesting adaptation to winemaking practices  
37 such as sulfite use. A possible evolutionary scenario explaining these results is discussed.

38

39

## 40 Introduction

41 *Brettanomyces bruxellensis* is one of the most infamous wine spoiler yeast, able to contaminate up to  
42 25% of red wines [1, 2]. Indeed, *B. bruxellensis* is known to produce specific compounds like volatile  
43 phenols, associated with unpleasant aromas, usually described as “horse sweat” or “leather” [3]. The  
44 contaminated wines have tainted organoleptic perception, decreased fruitiness [4, 5] and  
45 consequently are rejected by the consumers [6].

46 An important bibliography is dedicated to the *B. bruxellensis* species, with 100 to 200 papers  
47 published each year of the last decade (source: Google Scholar). Many papers investigate volatile  
48 phenol production [7-10], the biotic and abiotic factors impacting *B. bruxellensis* growth [11-15] and  
49 some peculiarities of the species like the ability to survive in the VNC (Viable Non Culturable) state  
50 [7, 16, 17] or the specific oxygen needs during fermentation [18]. Moreover, different detection and  
51 quantification methods for *Brettanomyces*, ranging from direct plating methods through molecular  
52 detection and flow cytometry analysis, were examined (see Tubia et al., 2018 for review [19]). The  
53 genetic diversity of the species has also been largely investigated, and a plethora of markers were  
54 developed across the years, including RAPD (Random Amplified Polymorphic DNA) [20], AFLP  
55 (Amplified Fragment Length Polymorphism)[21], REA-PFGE (pulsed field electrophoresis) [22], Sau-  
56 PCR [23], PCR-DGGE [24], mtDNA restriction analysis, ISS-PCR (introns 5' splice site  
57 sequence)[25, 26], etc. In the wine industry, most of these genetic analyses revealed high diversity  
58 within the species, at the vineyard, in the winery or at sample levels [8, 23, 27-29]. However, in most  
59 cases, only a small subset of isolates (a few dozens) were included, and these markers, although  
60 discriminant, were not appropriate for population genetic studies. Recently, a great advance was made  
61 with the genome sequencing of different *B. bruxellensis* strains [30-36], revealing the existence of  
62 diploid and allotriploid strains. This genetic oddity prompted the development of microsatellite  
63 markers, particularly well-adapted for large-scale population studies [37, 38]. Twelve markers were  
64 applied to a unique collection of more than 1500 strains of *B. bruxellensis* from various countries and  
65 different fermentation niches (wine, beer, bioethanol, tequila, kombucha, cider) [38, 39]. The strains

66 were clustered in 6 genetic groups, depending on both their ploidy level (diploid versus triploid) and  
67 their substrate of isolation [38]. Besides their genetic difference, these populations presented  
68 contrasted phenotypes: two different groups of triploid strains, mostly associated with wine substrate,  
69 showed tolerance or resistance to sulfur dioxide, the most common preservative used in winemaking  
70 [39-41]. A preliminary study on a small subset of 8 strains suggested variability in bioadhesion and  
71 colonization properties [42]. Altogether, these results indicate that the genetic diversity of *B.*  
72 *bruxellensis* is shaped by anthropic activities, including the winemaking process. Though, the precise  
73 impact of wine-related activities on *B. bruxellensis* populations remains to be precisely described. In  
74 this work, we focused on the 1411 isolates previously genotyped associated with wine niche (wine,  
75 grapes, cellar equipment, etc.). We searched for the geographical and temporal trends underlying wine  
76 *B. bruxellensis* diversity at the species and wine niche levels. Finally, a specific attention on ‘clones’  
77 (i.e. isolates displaying identical genotypes) is proposed.

78

## 79 **Material & Methods**

### 80 **Yeast strains and microsatellite genotyping**

81 We used 1411 isolates of *B. bruxellensis* associated with the wine production from 21 countries (S1  
82 Table). Agar-YPD medium containing 10 g.L<sup>-1</sup> yeast extract (Difco Laboratories, Detroit M1), 10  
83 g.L<sup>-1</sup> bactopectone (Difco Laboratories, Detroit M1), 20 g.L<sup>-1</sup> D-glucose (Sigma-Aldrich) and 20  
84 g.L<sup>-1</sup> agar (Sigma-Aldrich) was used for day-to-day growth. All isolates were kept at -80°C in  
85 glycerol:YPD (50:50) medium. Twelve microsatellites were used for *B. bruxellensis* genotyping as  
86 previously described, and the microsatellite datasets (encompassing non-wine strains) were published  
87 by Avramova et al (2017), Dimopoulou et al (2019) and Lleixa et al (submitted) [37, 38, 43].

### 88 **Data analysis**

89 The microsatellite dataset was analyzed using R and various packages. Principal Component Analysis  
90 (PCA) was performed using ade4 package [44]. Not available (NA) data (around 6% missing data)  
91 were replaced by the closest neighbour data (only for PCA analysis). The connection network and  
92 minimum spanning tree was built using the chooseCN function from adegenet package [45, 46].  
93 Diversity indexes were calculated using the poppr package [47, 48], and 95% confidence intervals  
94 were calculated using 100 bootstrap replicates.

95 For the geographic distribution, maps were drawn using R *maps* package and pies using *graphics*  
96 package. Kilometric distances between clones were calculated from longitude and latitude coordinates  
97 using the sp package [49].

98

99

## 100 **Results**

### 101 ***B. bruxellensis* wine isolates show high genetic diversity and distribution varying with the** 102 **country and the vineyard region**

103 1411 wine isolates from 21 countries were included in our analysis, resulting in 340 genotypes. The  
104 isolates' set is represented as a minimum spanning tree (Fig 1). These isolates belong mostly to the 5  
105 previously described genetic groups (Table 1): 521 isolates belong to the diploid wine group (Wine  
106 2N, CBS 2499-like, darkcyan), 551 to the red triploid wine group (Wine 3N, AWRI1499-like, red),  
107 229 to the triploid beer group (Beer 3N, AWRI1608-like, orange), 69 to the kombucha diploid group  
108 (Kombucha 2N, L14165-like, green), 40 to the other triploid wine group (Wine 3N, L0308-like,  
109 turquoise) and 1 from the tequila/bioethanol triploid group (blue). Within these groups, contrasting  
110 genetic diversity was highlighted, with Shannon's diversity index ranging from low (0.97) to high  
111 (3.73, see Table 1). The lower diversity was estimated for the Wine 2N group, suggesting high clonal  
112 expansion within this group, whereas higher diversity was obtained for the Wine/Kombucha 2N group  
113 and Wine 3N turquoise and Wine/beer 3N groups. Wine/Kombucha 2N and Wine 3N turquoise group  
114 showed an equitability index closed to 1, suggesting a more even distribution of the genotypes among  
115 the genetic group compared to Wine 2N group. Simpson's diversity and Equitability indexes  
116 showed the same trend. Overall, the percentage of triploid wine isolates was 58%, indicating that the  
117 triploid state, far from being rare, has a large extend.

118

119 **Figure 1: Minimum spanning tree of wine *Brettanomyces bruxellensis* isolates based on genetic**  
120 **distances.** 1411 strains were genotyped using 12 microsatellite markers. A PCA was performed using  
121 the R ade4 package. Only the two first axes (principal component, PC1 and PC2) were represented.  
122 The connection network and minimum spanning tree was built using the chooseCN function from R  
123 adegenet package. For genetically identical isolates (aka 'clones'), the size of the points is log10  
124 proportional to the number of isolates.

125 **Table 1. Distribution of 1411 wine isolates of *Brettanomyces bruxellensis* and main diversity parameters.**

| Group name         | Reference strain  | Color      | Number of wine isolates | Number of genotypes (richness) | Shannon's diversity index | Shannon's Equitability index (Evenness) | Simpson's diversity index | Simpson's Equitability index |
|--------------------|-------------------|------------|-------------------------|--------------------------------|---------------------------|-----------------------------------------|---------------------------|------------------------------|
| Wine 2N            | CBS 2499          | darkeyan   | 521                     | 58                             | 0.972 [0.789-1.455]       | 0.239 [0.221-0.372]                     | 1.364 [1.301-1.804]       | 0.024 [0.024-0.039]          |
| Wine/Kombucha 2N   | L14165 (UCD 2399) | olivedrab3 | 69                      | 50                             | 3.732 [3.13-3.732]        | 0.954 [0.911-0.967]                     | 31.53 [16.184-31.53]      | 0.631 [0.495-0.796]          |
| Wine/Beer 3N       | AWRI1608          | orange     | 229                     | 88                             | 2.92 [2.557-3.65]         | 0.652 [0.618-0.831]                     | 4.373 [3.624-14.466]      | 0.05 [0.05-0.189]            |
| Wine 3N            | AWRI1499          | red        | 551                     | 118                            | 1.83 [1.6-2.22]           | 0.384 [0.368-0.493]                     | 1.884 [1.776-2.581]       | 0.016 [0.016-0.029]          |
| Tequila/Ethanol 3N | CBS 5512          | royalblue4 | 1                       | 1                              | NR                        | NR                                      | NR                        | NR                           |
| Wine 3N            | L0308             | turquoise  | 40                      | 26                             | 2.856 [2.098-2.856]       | 0.877 [0.793-0.943]                     | 9.756 [5.08-13.92]        | 0.375 [0.323-0.708]          |

126 For each diversity parameter, the 95% confidence interval is indicated in brackets. NR means Not Relevant.

127 The genetic distribution of the wine isolates was then assessed per country, or per wine-producing  
128 region when sufficient isolates were available (Fig 2). In France, 5 regions were examined (Fig 2A):  
129 Bordeaux, Languedoc, Burgundy, Jura and Cotes-du-Rhone. In Bordeaux, 732 isolates were  
130 genotyped and were mainly distributed into two genetic groups: the Wine 2N group (darkcyan,  
131 sensitive to SO<sub>2</sub>, encompassing 345/732 of Bordeaux isolates), and the red Wine 3N (tolerant to SO<sub>2</sub>,  
132 373/732). By contrast, in Burgundy, only a small percentage of the 157 isolates belonged to the Wine  
133 2N group (16/157), while the most represented groups were the Beer 3N (orange, 95/157) and the red  
134 Wine 3N (42/157). Cotes-du-Rhone also displayed a high proportion of isolates belonging to the Beer  
135 3N group (orange, 26/36), beside to the Wine 2N (darkcyan, 6/36) and the red Wine 3N (4/36). In  
136 Jura, two genetic groups dominated: the red Wine 3N (8/16) and the Beer 3N (orange, 8/16). Finally,  
137 isolates from Languedoc mostly fell within the Wine 2N group (darkcyan 63/108), the remaining  
138 isolates belonging to the red Wine 3N group (19/108), the turquoise Wine 3N group (15/108) and the  
139 Kombucha 2N group (green, 9/108). In Italy, the three regions tested (Calabria, Campania, Puglia)  
140 showed various genetic distributions, Puglia being mostly associated with the Wine 2N group, and  
141 Calabria/Campania with the red Wine 3N group. Denmark was associated with Wine 2N (darkcyan)  
142 and Beer 3N groups (orange), while Portugal showed an almost perfect equitable distribution into the  
143 five genetic groups. Isolates from Spain (mostly from Catalonia) showed the dominance of the orange  
144 group while Greece was mostly associated with the Kombucha 2N group (green) and then with the red  
145 Wine 3N group (Fig 2A). In non-European countries (Fig 2B), the genetic distribution of *B.*  
146 *bruxellensis* was also contrasted, with the diploid wine group (darkcyan) dominant in USA, Brazil and  
147 South Africa, and the red triploid wine group dominant in Australia.

148

149 **Figure 2. Genetic distribution of *Brettanomyces bruxellensis* wine isolates in different regions or**  
150 **countries.** Same group colors as in Fig 1. Maps were drawn using *maps* packages and pies using  
151 *graphics* package.

152



153 When summing-up all these regional specific distributions, some trends emerged: the Wine 2N  
154 (darkcyan) and the red Wine 3N groups were isolated in almost every region/country. The Beer 3N  
155 group (orange) was more dominant around a meridian crossing Denmark, the east of France and Italy  
156 (except for Spain), while the Kombucha 2N group (green) was mostly found around Mediterranean  
157 countries. Furthermore, isolates tolerant/resistant to sulfites (belonging to the red or turquoise Wine  
158 3N groups), were found in almost all regions/countries.

### 159 **The temporal distribution of *B. bruxellensis* wine isolates reveals important evolution over the** 160 **last century**

161 Most of the studied strains were isolated in the last decade from wines sampled within two years after  
162 grapes harvesting (vintage). However, 157 isolates were isolated prior to 2000 and/or were isolated  
163 from bottles containing old vintages. For example, three strains were isolated from 1909-wine, five  
164 isolates from 1911-wine, etc. Most of the wines with vintages older than 2000 were analyzed several  
165 years after bottling (S1 Table).

166 The genetic distribution of *B. bruxellensis* strains in wines older than one century, with 20-years  
167 intervals, is shown on Fig 3. Without exceptions, isolates from wines produced before-1990 (104  
168 isolates) all belonged to diploid groups, mostly from the Wine 2N group (darkcyan). The Wine 2N  
169 group, represented 67% of the isolates from wines produced in 1981-2000, and only 32% of the  
170 isolates from wines produced in 2001-2020. For the red Wine 3N group, tolerant/resistant to sulfite,  
171 the older wine displaying such isolate dates back to 1990, and was isolated 15 years after wine  
172 elaboration. The proportion of “red” isolates increased from 23% for 1981-2000 period and to 43% for  
173 the wines produced during 2001-2020. Similarly, the Beer 3N group that was first isolated from a wine  
174 of 1995 vintage represented only 4% of the isolates from wines produced between 1981 and 2000, and  
175 18% of the isolates from wines produced between 2001-2020. For the other genetic groups, the older  
176 isolates were found in wine as old as 1956 for Kombucha 2N (and represented around 4-5% of the  
177 population), 1994 for turquoise Wine 3N (1% and 3% found in wines produced in 1981-2000 and after  
178 2001 respectively), and 2002 for Tequila/Ethanol (less than 1%). Unless the late sampling of the wine

179 (>15 years) biases the analyses, the temporal distribution of *B. bruxellensis* wine isolates shows a clear  
180 shift from domination by the 2N darkcyan genetic group in old vintages to 3N red genetic group  
181 prevalence among isolates from wines produced over the last decades.

182 **Figure 3. Distribution of *B. bruxellensis* wine isolates from different genetic groups over**  
183 **vintages.** 20 years-intervals were used. In order to calculate confidence intervals, 100 bootstraps were  
184 performed (re-sampling of the population). Error bars correspond to 95% confidence interval.

185

186 **The same *B. bruxellensis* genotypes can be identified in wines produced in a given cellar over**  
187 **decades**

188 We then focused on *B. bruxellensis* clones. In this paper ‘clones’ will be defined as genetically  
189 identical isolates for all 12 microsatellite markers tested. Over the 1411 isolates, 138 groups of clones  
190 were identified, encompassing 2 to 114 isolates. We searched whether some clones were identified  
191 repeatedly in the same winery over different vintages. Forty-two groups of clones contained isolates  
192 isolated several times in 11 wineries from France and Italy (Fig 4). For example, in winery A1, 9 clone  
193 groups were identified: 7 from the Wine 2N and 2 from the red Wine 3N. Clones from the group n°4  
194 (Wine 2N) were isolated independently in wines of vintages 1909, 1948 and 1970, while clones from  
195 the group n°8 were isolated in wines produced in 1990, 2012, 2013 and 2014. Similarly, for winery  
196 B1, 15 clone groups were evidenced: clones from the group n°12 (Wine 2N) were isolated repeatedly  
197 in wines of vintages 1961, 1985, 1996 and 2014 wines while clones from the group n°22 (Wine 3N)  
198 were isolated in wines produced in 2003, 2010, 2012, 2013 and 2014. Thus, in several wineries,  
199 genetically identical strains were isolated from wines of different vintages, sometimes from different  
200 decades. The longer interval (86 years) was found for winery B1, with clones from the group n°3  
201 isolated in wines produced in 1926 and 2012.

202

203 **Figure 4. Identification of clone groups within the same winery over different vintages.**

204 Genetically identical isolates were designed as clone group. 42 groups gathering clones isolated from  
205 the same winery over different vintages were identified, corresponding to 11 wineries from France and  
206 Italy. Same colors as in Fig 1 for each genetic group.

207

208 Fig 4 also illustrates that, within a given sample, different *B. bruxellensis* can be isolated. In fact, if we  
209 considered the strains isolated from the same samples, our collection contained 57 wine samples for  
210 which at least 5 isolates were analysed (mostly from France or Italy). In 45 out of 57 samples, we  
211 found isolates from two different genetic groups, highlighting the high diversity of *B. bruxellensis* at  
212 sample level.

213 **Wines from different countries and/or continents can be spoiled by the same *B. bruxellensis***  
214 **clone**

215 Since some clones were able to persist over several years in the cellar, we searched whether wine-  
216 producing regions were associated with specific clones. No ‘signature’ was identified, meaning that no  
217 specific genotypes were associated with the studied regions. Instead, we found that some clone groups  
218 were highly disseminated. For example, the clone group n°16 (Wine 2N, darkcyan) encompassed 96  
219 isolates from Denmark, France, Portugal and USA (Fig 5A). Another example is clone group n°67 (6  
220 isolates), isolated in wines from Italy, Portugal and South Africa. In the other genetic groups also,  
221 several examples of dissemination were found (Fig 5B): the clone group n°24 (red Wine 3N)  
222 encompassed 29 isolates from France, Italy and USA, while clone group n°35 were found in France,  
223 Italy and South Africa.

224

225 **Figure 5. Examples of spatial dispersion of wine clones of *B. bruxellensis*.** Over the 138 clone  
226 groups identified, 24 encompassed isolates from different countries. For clarity, only 7 of these groups  
227 (number 2, 16, 24, 35, 47, 67, 72) are represented here.

228

229 In order to quantify the level of clonal dissemination, we computed the kilometric distance separating  
230 the different isolates belonging to a given clone group (Fig 6). 88% of clone pairs were localized in the  
231 same region, with kilometric distance inferior to 100km ('local clone pairs'), of which 34% had  
232 distance inferior to 1km. 4% were separated by ~100-750km, usually associated with inter-country  
233 distances, less than 1% were distant of ~750-1000km (intra-continental distances), and 6% were  
234 separated by more than 1000km (inter-continental distances). It has to be noted that all isolates were  
235 considered here, including clonal isolates from the same wine samples that may drift the distribution  
236 toward zero kilometric distance. Thus, *B. bruxellensis* clones appear to mainly disseminate in short  
237 distances while a significant proportion of them showed high geographic dispersal with distances  
238 incompatible with natural dispersion.

239

240 **Figure 6: Kilometric distances between wine clones of *B. bruxellensis*.** For each clone pairs, the  
241 separating distance was calculated. Genetically identical isolates separated by less than 100km were  
242 considered as "local clone pairs".

243

## 245 **Discussion**

246 In this work, we studied the genetic diversity and structuration of a large collection (>1400) of wine  
247 isolates of *B. bruxellensis*, from 21 countries across 5 continents. Most of these wine isolates belong to  
248 five of the six genetic groups previously described at the species level [38], and confirmed the high  
249 genetic diversity of this yeast species [23, 27]. Interestingly, we showed that the distribution of  
250 *B. bruxellensis* wine isolates varied greatly from one country/region to another. For some regions,  
251 hundreds of isolates were studied (e.g. Bordeaux region, >700 isolates), while smaller subsets were  
252 considered for others (16 isolates for Portugal or Australia, for example). Thus, it will be necessary to  
253 further those results with a larger number of isolates for all regions. At a large scale, our results  
254 confirm that the two wine triploid groups showing sulfite resistance/tolerance are identified in 14  
255 regions/countries out of 16 and are widespread worldwide.

256 Our results reveal the unequal distribution of the different genetic groups at both the geographical and  
257 time level, suggesting that some environmental factors (climate, temperature, grape varieties etc.)  
258 leading to specific wine composition (pH, ethanol and polyphenols contents, etc.), and/or oenological  
259 practices (sulfur dioxide management, barrel ageing) could be shaping the diversity of these wine  
260 isolates. It will be interesting in a near future to identify those environmental/anthropic factors, and to  
261 examine the associated phenotypic characteristics.

### 262 ***B. bruxellensis* wine isolates show high spatiotemporal dispersion**

263 The analysis of clones (genetically identical isolates for all 12 microsatellites) revealed unexpected  
264 patterns: first, it was observed a cellar remanence of clones over decades despite modern hygienic  
265 practices, improved cleaning/disinfection protocols and a large choice of products and treatments [50-  
266 52]. This long-term remanence of *B. bruxellensis* wine isolates in a given cellar is remarkable. In  
267 *Saccharomyces cerevisiae*, the persistence of cellar-resident populations was shown, but on smaller  
268 period of time (over 20 years maximum) [53]. This exceptional temporal durability remains to be  
269 explored, but could be related to the specific survival ability of the species, even in a VNC form and to

270 its bioadhesion/biofilm forming capacity in the winery environment [42, 54]. Secondly, besides its  
271 cellar residency, some *B. bruxellensis* clones showed high geographical dispersal and were  
272 independently isolated from wines originated from different producing regions, countries and  
273 sometimes even from different continents. At a regional scale, the clonal dispersal could be promoted  
274 through yeast vectors like insects and birds for a distance inferior to 100km [55-57]. However, for a  
275 significant number of clone groups, the calculated kilometric distance is incompatible with the natural  
276 dispersion, indicating the involvement of human activities. Indeed, the exchange of contaminated  
277 equipment (barrels, bottling equipment, pumps, etc.), the international wine trade and human transport  
278 of goods (fruits, etc.) could probably explain such situation [58]. The possibility to isolate clones in  
279 wines from old vintages is another example of the specific ability of the species to survive in wines  
280 after bottle aging and possibly explain world dissemination of clones through wine exports. In  
281 addition, exchanges may also happen between different industrial processes, allowing also niches  
282 dispersal of the species. However, it was previously shown that the dispersal was higher for wine  
283 isolates than other processes, suggesting different dispersal patterns for the different fermentation  
284 processes. Altogether, these results are consistent with the exchange of contaminated wine-related  
285 material, followed by adaptation to local winemaking practices, as suggested before [38]. These results  
286 draw an atypical picture of *B. bruxellensis* opportunistic lifestyle, mostly sedentary with nomad  
287 propensities.

### 288 **Allotriploidisation: a recent adaptation to winemaking practices?**

289 One of the most interesting results of this work is the fact that isolates from old vintages mostly belong  
290 to a unique group, the so-called “wine diploid” (darkcyan), while, intriguingly, this group represents  
291 only  $\approx 31\%$  of nowadays isolates. The oldest isolates for the triploid genetic groups date back the 1981-  
292 2000 interval, which is particularly surprising for the Wine 3N (red) group that encompasses  $\approx 45\%$  of  
293 recent isolates and in a less extend for the Wine/Beer 3N (orange) group showing  $\approx 16\%$  of recent  
294 isolates. It has to be noted that most of the ‘old’ isolates were actually isolated recently from ‘old’  
295 vintages (eg strain L0626 that was isolated in 2006 from a 1909 vintage). Thus, two main hypotheses  
296 can explain this result: either isolates from the Wine 2N group have higher survival or revival rates or

297 the triploid groups emerged more recently, during the 1981-2000 period. It is not possible from our  
298 data to favor one or the other scenario. Subsequent strain isolations will help determine whether the  
299 different genetic groups display contrasted ability to survive in wines over decades, thus formally  
300 testing the first hypothesis. On the opposite, some elements could be consistent with the second  
301 hypothesis: first, wines produced these last decades are characterized by higher ethanol content as a  
302 consequence of climate change [59, 60]. Cibrario et al recently showed that some strains of the Wine  
303 3N red group were highly tolerant to high ethanol content [61]. It can be hypothesized that the  
304 progressive increase in wine alcohol level could have triggered the selection of fitter individuals  
305 regarding ethanol content. Second, the two Wine 3N groups (red and turquoise) show an outstanding  
306 phenotypic trait related to adaptation to modern winemaking practices, namely sulfite  
307 tolerance/resistance. While sulfur dioxide addition is used in winemaking at least since the 18<sup>th</sup>  
308 century, it became the preferred treatment for *B. bruxellensis* spoilage in the 90's, when Chatonnet et  
309 al. demonstrated formally that the species was the main responsible for ethylphenol production in wine  
310 [3]. Subsequently, control strategies encouraging the use of recurrent sulfite treatments at high dosage  
311 have emerged [62]. One possible outcome of the adoption of these strategies by the wine industry  
312 might have been the selection of tolerant/resistant strains. For example, in Australia where the use of  
313 larger quantities of sulfite was promoted [58, 63], 92% of *B. bruxellensis* wine isolates were SO<sub>2</sub>-  
314 tolerant in 2012 while in Greece the isolates that belong to the tolerant/resistant group were  
315 exclusively isolated from sweet red wine where higher doses of SO<sub>2</sub> are detected and permitted [64].  
316 Winemaking environments may have supported the existence of specific selective pressure favouring  
317 the retaining of fitter allotriploid individuals and their progressive proliferation in the last decades.  
318 Indeed, competition experiments between tolerant and sensitive strains showed that the former  
319 outcompeted the latter in high SO<sub>2</sub> concentrations [41]. Altogether, our results suggest that  
320 independent allotriploidisation events in *B. bruxellensis* may have allowed diversification and  
321 subsequent adaptation to winemaking practices.

## 322 **Acknowledgments**

323 The authors thank the different wineries who kindly provided wine samples. This work received  
324 financial support from the Conseil Interprofessionnel des Vins de Bordeaux (CIVB, Grant number:  
325 2014/2015 40792), from Région Aquitaine (Grant number: 2014:1R20203-00002990), from France  
326 Agrimer (Grant number: 7120154146) and by the French National Research Agency (ANR-18-CE20-  
327 0003). A.M. and M.C.P. participation was supported by a project from the Spanish Government  
328 (AGL2015-73273-JIN). The funders had no role in study design, data collection and analysis, decision  
329 to publish, or preparation of the manuscript.



## 330 **References**

- 331 1. Gerbaux V, Jeudy S, Monamy C. Étude des phénols volatils dans les vins de Pinot noir en  
332 Bourgogne. Bulletin de l'OIV. 2000:581-99.
- 333 2. Conterno L, Joseph CML, Arvik TJ, Henick-Kling T, Bisson LF. Genetic and Physiological  
334 Characterization of *Brettanomyces bruxellensis* Strains Isolated from Wines. AJEV.  
335 2006;57(2):139-47.
- 336 3. Chatonnet P, Dubourdieu D, Boidron J-n, Pons M. The origin of ethylphenols in wines.  
337 JSFA. 1992;60(2):165-78. doi: 10.1002/jsfa.2740600205.
- 338 4. Romano A, Perello MC, Lonvaud-Funel A, Sicard G, de Revel G. Sensory and analytical re-  
339 evaluation of "Brett character". Food Chemistry. 2009;114(1):15-9. doi:  
340 10.1016/j.foodchem.2008.09.006. PubMed PMID: ISI:000263216000003.
- 341 5. Tempere S, Schaaper MH, Cuzange E, de Lescar R, de Revel G, Sicard G. The olfactory  
342 masking effect of ethylphenols: Characterization and elucidation of its origin. Food Quality and  
343 Preference. 2016;50:135-44. doi: 10.1016/j.foodqual.2016.02.004.
- 344 6. Lattey KA, Bramley BR, Francis IL. Consumer acceptability, sensory properties and  
345 expert quality judgements of Australian Cabernet Sauvignon and Shiraz wines. Australian  
346 Journal of Grape and Wine Research. 2010;16(1):189-202. doi: 10.1111/j.1755-  
347 0238.2009.00069.x.
- 348 7. Agnolucci M, Rea F, Sbrana C, Cristani C, Fracassetti D, Tirelli A, et al. Sulphur dioxide  
349 affects culturability and volatile phenol production by *Brettanomyces/Dekkera bruxellensis*.  
350 International Journal of Food Microbiology. 2010;143(1):76-80. doi:  
351 10.1016/j.ijfoodmicro.2010.07.022.
- 352 8. Campolongo S, Rantsiou K, Giordano M, Gerbi V, Cocolin L. Prevalence and Biodiversity of  
353 *Brettanomyces bruxellensis* in Wine from Northwestern Italy. Am J Enol Vitic. 2010;61(4):486-91.  
354 doi: 10.5344/ajev.2010.10034.
- 355 9. Dias L, Pereira-da-Silva S, Tavares M, Malfeito-Ferreira M, Loureiro V. Factors affecting  
356 the production of 4-ethylphenol by the yeast *Dekkera bruxellensis* in enological conditions. Food

- 357 Microbiology. 2003;20(4):377-84. doi: 10.1016/S0740-0020(03)00023-6. PubMed PMID:  
358 ISI:000182882900001.
- 359 10. Romano A, Perello MC, Revel Gd, Lonvaud-Funel A. Growth and volatile compound  
360 production by *Brettanomyces/Dekkera bruxellensis* in red wine. Journal of Applied  
361 Microbiology. 2008;104(6):1577-85. doi: 10.1111/j.1365-2672.2007.03693.x.
- 362 11. Barata A, Caldeira J, Botelho R, Pagliara D, Malfeito-Ferreira M, Loureiro V. Survival  
363 patterns of *Dekkera bruxellensis* in wines and inhibitory effect of sulphur dioxide. Int J Food  
364 Microbiol. 2008;121(2):201-7. doi: 10.1016/j.ijfoodmicro.2007.11.020. PubMed PMID:  
365 18077036.
- 366 12. Berbegal C, Garofalo C, Russo P, Pati S, Capozzi V, Spano G. Use of Autochthonous Yeasts  
367 and Bacteria in Order to Control *Brettanomyces bruxellensis* in Wine. Fermentation.  
368 2017;3(4):65. doi: 10.3390/fermentation3040065.
- 369 13. de Barros Pita W, Tiukova I, Leite FCB, Passoth V, Simões DA, de Morais MA. The  
370 influence of nitrate on the physiology of the yeast *Dekkera bruxellensis* grown under oxygen  
371 limitation. Yeast. 2013;30(3):111-7. doi: 10.1002/yea.2945.
- 372 14. Muktaduzzaman M, Galafassi S, Capusoni C, Vigentini I, Ling Z, Piskur J, et al. Galactose  
373 utilization sheds new light on sugar metabolism in the sequenced strain *Dekkera bruxellensis*  
374 CBS 2499. FEMS Yeast Res. 2015;15(2). doi: 10.1093/femsyr/fou009. PubMed PMID: 25673757.
- 375 15. Renouf V, Falcou M, Miot-Sertier C, Perello MC, De Revel G, Lonvaud-Funel A. Interactions  
376 between *Brettanomyces bruxellensis* and other yeast species during the initial stages of  
377 winemaking. J Appl Microbiol. 2006;100(6):1208-19. doi: 10.1111/j.1365-2672.2006.02959.x.
- 378 16. Capozzi V, Di Toro MR, Grieco F, Michelotti V, Salma M, Lamontanara A, et al. Viable But  
379 Not Culturable (VBNC) state of *Brettanomyces bruxellensis* in wine: New insights on molecular  
380 basis of VBNC behaviour using a transcriptomic approach. Food Microbiol. 2016;59:196-204.  
381 doi: 10.1016/j.fm.2016.06.007. PubMed PMID: 27375260.
- 382 17. Serpaggi V, Remize F, Recorbet G, Gaudot-Dumas E, Sequeira-Le Grand A, Alexandre H.  
383 Characterization of the "viable but nonculturable" (VBNC) state in the wine spoilage yeast

- 384 Brettanomyces. Food Microbiol. 2012;30(2):438-47. doi: 10.1016/j.fm.2011.12.020. PubMed  
385 PMID: 22365358.
- 386 18. Galafassi S, Capusoni C, Moktaduzzaman M, Compagno C. Utilization of nitrate abolishes  
387 the "Custers effect" in *Dekkera bruxellensis* and determines a different pattern of fermentation  
388 products. J Ind Microbiol Biotechnol. 2013;40(3-4):297-303. doi: 10.1007/s10295-012-1229-3.  
389 PubMed PMID: 23354425.
- 390 19. Tubia I, Prasad K, Perez-Lorenzo E, Abadin C, Zumarraga M, Oyanguren I, et al. Beverage  
391 spoilage yeast detection methods and control technologies: A review of *Brettanomyces*. Int J  
392 Food Microbiol. 2018;283:65-76. doi: 10.1016/j.ijfoodmicro.2018.06.020. PubMed PMID:  
393 30099997.
- 394 20. Mitrakul CM, Henick-Kling T, Egli CM. Discrimination of *Brettanomyces*/*Dekkera* yeast  
395 isolates from wine by using various DNA finger-printing methods. Food Microbiology.  
396 1999;16(1):3-14. doi: 10.1006/fmic.1998.0217.
- 397 21. Curtin CD, Bellon JR, Henschke PA, Godden PW, De Barros Lopes MA. Genetic diversity of  
398 *Dekkera bruxellensis* yeasts isolated from Australian wineries. FEMS Yeast Research.  
399 2007;7(3):471-81. doi: 10.1111/j.1567-1364.2006.00183.x.
- 400 22. Miot-Sertier C, Lonvaud-Funel A. Development of a molecular method for the typing of  
401 *Brettanomyces bruxellensis* (*Dekkera bruxellensis*) at the strain level. Journal of Applied  
402 Microbiology. 2007;102(2):555-62. doi: 10.1111/j.1365-2672.2006.03069.x.
- 403 23. Di Toro MR, Capozzi V, Beneduce L, Alexandre H, Tristezza M, Durante M, et al.  
404 Intraspecific biodiversity and 'spoilage potential' of *Brettanomyces bruxellensis* in Apulian  
405 wines. LWT - Food Science and Technology. 2015;60(1):102-8. doi: 10.1016/j.lwt.2014.06.059.
- 406 24. Oelofse A, Lonvaud-Funel A, du Toit M. Molecular identification of *Brettanomyces*  
407 *bruxellensis* strains isolated from red wines and volatile phenol production. Food Microbiol.  
408 2009;26(4):377-85. doi: 10.1016/j.fm.2008.10.011. PubMed PMID: 19376458.
- 409 25. Vigentini I, De Lorenzis G, Picozzi C, Imazio S, Merico A, Galafassi S, et al. Intraspecific  
410 variations of *Dekkera/Brettanomyces bruxellensis* genome studied by capillary electrophoresis

- 411 separation of the intron splice site profiles. International Journal of Food Microbiology.  
412 2012;157(1):6-15. doi: 10.1016/j.ijfoodmicro.2012.02.017.
- 413 26. Guzzon R, Larcher R, Guarcello R, Francesca N, Settanni L, Moschetti G. Spoilage potential  
414 of *Brettanomyces bruxellensis* strains isolated from Italian wines. Food Research International.  
415 2018;105:668-77. doi: 10.1016/j.foodres.2017.11.078.
- 416 27. Agnolucci M, Vigentini I, Capurso G, Merico A, Tirelli A, Compagno C, et al. Genetic  
417 diversity and physiological traits of *Brettanomyces bruxellensis* strains isolated from Tuscan  
418 Sangiovese wines. International Journal of Food Microbiology. 2009;130(3):238-44. doi:  
419 10.1016/j.ijfoodmicro.2009.01.025.
- 420 28. Oro L, Canonico L, Marinelli V, Ciani M, Comitini F. Occurrence of *Brettanomyces*  
421 *bruxellensis* on Grape Berries and in Related Winemaking Cellar. Front Microbiol. 2019;10:415.  
422 doi: 10.3389/fmicb.2019.00415. PubMed PMID: 30899251; PubMed Central PMCID:  
423 PMC6416197.
- 424 29. Renouf V, Lonvaud-Funel A. Development of an enrichment medium to detect  
425 *Dekkera/Brettanomyces bruxellensis*, a spoilage wine yeast, on the surface of grape berries.  
426 Microb Research. 2007;162(2):154-67. doi: 10.1016/j.micres.2006.02.006.
- 427 30. Piškur J, Ling Z, Marcet-Houben M, Ishchuk OP, Aerts A, LaButti K, et al. The genome of  
428 wine yeast *Dekkera bruxellensis* provides a tool to explore its food-related properties. Int J Food  
429 Microbiol. 2012;157(2):202-9. doi: 10.1016/j.ijfoodmicro.2012.05.008.
- 430 31. Curtin CD, Borneman AR, Chambers PJ, Pretorius IS. De-Novo Assembly and Analysis of  
431 the Heterozygous Triploid Genome of the Wine Spoilage Yeast *Dekkera bruxellensis* AWRI1499.  
432 PLoS One. 2012;7(3). doi: 10.1371/journal.pone.0033840. PubMed PMID:  
433 ISI:000304489000038.
- 434 32. Fournier T, Gounot JS, Freel K, Cruaud C, Lemainque A, Aury JM, et al. High-Quality de  
435 Novo Genome Assembly of the *Dekkera bruxellensis* Yeast Using Nanopore MinION Sequencing.  
436 G3 (Bethesda). 2017;7(10):3243-50. doi: 10.1534/g3.117.300128. PubMed PMID: 28983066;  
437 PubMed Central PMCID: PMC5633375.

- 438 33. Valdes J, Tapia P, Cepeda V, Varela J, Godoy L, Cubillos FA, et al. Draft genome sequence  
439 and transcriptome analysis of the wine spoilage yeast *Dekkera bruxellensis* LAMAP2480  
440 provides insights into genetic diversity, metabolism and survival. *FEMS Microbiol Lett.*  
441 2014;361(2):104-6. doi: 10.1111/1574-6968.12630. PubMed PMID: 25328076.
- 442 34. Olsen RA, Bunikis I, Tiukova I, Holmberg K, Lotstedt B, Pettersson OV, et al. De novo  
443 assembly of *Dekkera bruxellensis*: a multi technology approach using short and long-read  
444 sequencing and optical mapping. *GigaScience.* 2015;4:56. doi: 10.1186/s13742-015-0094-1.  
445 PubMed PMID: 26617983; PubMed Central PMCID: PMC4661999.
- 446 35. Borneman AR, Zeppel R, Chambers PJ, Curtin CD. Insights into the *Dekkera bruxellensis*  
447 Genomic Landscape: Comparative Genomics Reveals Variations in Ploidy and Nutrient  
448 Utilisation Potential amongst Wine Isolates. *PLoS Genet.* 2014;10(2):e1004161. doi:  
449 10.1371/journal.pgen.1004161.
- 450 36. Crauwels S, Zhu B, Steensels J, Busschaert P, De Samblanx G, Marchal K, et al. Assessing  
451 Genetic Diversity among *Brettanomyces* Yeasts by DNA Fingerprinting and Whole-Genome  
452 Sequencing. *Applied and Environmental Microbiology.* 2014;80(14):4398-413. doi:  
453 10.1128/AEM.00601-14. PubMed PMID: PMC4068659.
- 454 37. Albertin W, Panfili A, Miot-Sertier C, Goulielmakis A, Delcamp A, Salin F, et al.  
455 Development of microsatellite markers for the rapid and reliable genotyping of *Brettanomyces*  
456 *bruxellensis* at strain level. *Food Microbiol.* 2014;42:188-95. doi: 10.1016/j.fm.2014.03.012.
- 457 38. Avramova M, Cibrario A, Peltier E, Coton M, Coton E, Schacherer J, et al. *Brettanomyces*  
458 *bruxellensis* population survey reveals a diploid-triploid complex structured according to  
459 substrate of isolation and geographical distribution. *Scientific reports.* 2018;8(4136). doi:  
460 10.1038/s41598-018-22580-7.
- 461 39. Dimopoulou M, Hatzikamari M, Masneuf-Pomarede I, Albertin W. Sulfur dioxide response  
462 of *Brettanomyces bruxellensis* strains isolated from Greek wine. *Food Microbiol.*  
463 2019;78:155:63. doi: 10.1016/j.fm.2018.10.013.

- 464 40. Avramova M, Vallet-Courbin A, Maupeu J, Masneuf-Pomarède I, Albertin W. Molecular  
465 Diagnosis of *Brettanomyces bruxellensis*' Sulfur Dioxide Sensitivity Through Genotype Specific  
466 Method. *Frontiers in Microbiology*. 2018;9(1260). doi: 10.3389/fmicb.2018.01260.
- 467 41. Avramova M, Varela C, Grbin P, Borneman A, Albertin W, Masneuf-Pomarede I.  
468 Competition experiments between *Brettanomyces bruxellensis* strains reveal specific adaptation  
469 to SO<sub>2</sub>. *FEMS Yeast Res*. In press. doi: 10.1093/femsyr/foz010.
- 470 42. Dimopoulou M, Renault M, Dols-Lafargue M, Albertin W, Herry JM, Bellon-Fontaine MN,  
471 et al. Microbiological, biochemical, physicochemical surface properties and biofilm forming  
472 ability of *Brettanomyces bruxellensis*. *Ann Microbiol*. in press.
- 473 43. Lleixà J, Martínez-Safont M, Magani M, Masneuf-Pomarede I, Albertin W, Mas A, et al.  
474 Genetic and phenotypic diversity of *Brettanomyces bruxellensis* isolates from aging wines. *Food*  
475 *Microbiol*. submitted.
- 476 44. Dray S, Dufour A. The ade4 Package: Implementing the Duality Diagram for Ecologists.  
477 *Journal of Statistical Software*. 2007;22(4):1-20. doi: 10.18637/jss.v022.i04.
- 478 45. Jombart T. adegenet: a R package for the multivariate analysis of genetic markers.  
479 *Bioinformatics*. 2008;24(11):1403-5. doi: 10.1093/bioinformatics/btn129. PubMed PMID:  
480 18397895.
- 481 46. Jombart T, Ahmed I. adegenet 1.3-1: new tools for the analysis of genome-wide SNP data.  
482 *Bioinformatics*. 2011;27(21):3070-1. doi: 10.1093/bioinformatics/btr521. PubMed PMID:  
483 21926124; PubMed Central PMCID: PMC3198581.
- 484 47. Kamvar ZN, Brooks JC, Grunwald NJ. Novel R tools for analysis of genome-wide  
485 population genetic data with emphasis on clonality. *Frontiers in genetics*. 2015;6:208. doi:  
486 10.3389/fgene.2015.00208. PubMed PMID: 26113860; PubMed Central PMCID: PMC4462096.
- 487 48. Kamvar ZN, Tabima JF, Grunwald NJ. Poppr: an R package for genetic analysis of  
488 populations with clonal, partially clonal, and/or sexual reproduction. *PeerJ*. 2014;2:e281. doi:  
489 10.7717/peerj.281. PubMed PMID: 24688859; PubMed Central PMCID: PMC3961149.

- 490 49. Bivand RS, Pebesma E, Gomez-Rubio V. Applied spatial data analysis with R. New York:  
491 Springer-Verlag; 2013.
- 492 50. Lustrato G, Vigentini I, De Leonardis A, Alfano G, Tirelli A, Foschino R, et al. Inactivation  
493 of wine spoilage yeasts *Dekkera bruxellensis* using low electric current treatment (LEC). *Journal*  
494 *of Applied Microbiology*. 2010;109(2):594-604. doi: 10.1111/j.1365-2672.2010.04686.x.
- 495 51. Buzrul S. High hydrostatic pressure treatment of beer and wine: A review. *Innovative*  
496 *Food Science & Emerging Technologies*. 2012;13:1-12. doi: 10.1016/j.ifset.2011.10.001.
- 497 52. Fabrizio V, Vigentini I, Parisi N, Picozzi C, Compagno C, Foschino R. Heat inactivation of  
498 wine spoilage yeast *Dekkera bruxellensis* by hot water treatment. *Letters in Applied*  
499 *Microbiology*. 2015;61(2):186-91. doi: 10.1111/lam.12444.
- 500 53. Borlin M, Venet P, Claisse O, Salin F, Legras JL, Masneuf-Pomarede I. Cellar-associated  
501 *Saccharomyces cerevisiae* population structure revealed high diversity and perennial  
502 persistence in Sauternes wine estates. *Appl Environ Microbiol*. 2016. Epub 2016/03/13. doi:  
503 10.1128/AEM.03627-15. PubMed PMID: 26969698.
- 504 54. Joseph CML, Kumar G, Su E, Bisson LF. Adhesion and Biofilm Production by Wine Isolates  
505 of *Brettanomyces bruxellensis*. *AJEV*. 2007;58(3):373-8.
- 506 55. Goddard MR, Anfang N, Tang R, Gardner RC, Jun C. A distinct population of  
507 *Saccharomyces cerevisiae* in New Zealand: evidence for local dispersal by insects and human-  
508 aided global dispersal in oak barrels. *Environmental Microbiology*. 2010;12(1):63-73. doi:  
509 10.1111/j.1462-2920.2009.02035.x.
- 510 56. Francesca N, Canale DE, Settanni L, Moschetti G. Dissemination of wine-related yeasts by  
511 migratory birds. *Environmental microbiology reports*. 2012;4(1):105-12. doi: 10.1111/j.1758-  
512 2229.2011.00310.x. PubMed PMID: 23757236.
- 513 57. Stefanini I, Dapporto L, Legras JL, Calabretta A, Di Paola M, De Filippo C, et al. Role of  
514 social wasps in *Saccharomyces cerevisiae* ecology and evolution. *Proc Natl Acad Sci U S A*.  
515 2012;109(33):13398-403. Epub 2012/08/01. doi: 10.1073/pnas.1208362109. PubMed PMID:  
516 22847440; PubMed Central PMCID: PMC3421210.

- 517 58. Licker JL, Acree TE, Henick-Kling T. What Is "Brett" (*Brettanomyces*) Flavor?: A  
518 Preliminary Investigation. Chemistry of Wine Flavor. ACS Symposium Series. 714: American  
519 Chemical Society; 1998. p. 96-115.
- 520 59. Bock A, Sparks TH, Estrella N, Menzel A. Climate-Induced Changes in Grapevine Yield and  
521 Must Sugar Content in Franconia (Germany) between 1805 and 2010. PLOS ONE.  
522 2013;8(7):e69015. doi: 10.1371/journal.pone.0069015.
- 523 60. Gaidos S. Grape expectations: Climate change is already transforming the wine industry.  
524 Science News. 2014;185(3):20-4. doi: 10.1002/scin.5591850316.
- 525 61. Cibrario A, Miot-Sertier C, Paulin M, Bullier B, Riquier L, Perello MC, et al. *Brettanomyces*  
526 *bruxellensis* phenotypic diversity, tolerance to wine stress and spoilage ability. Submitted.
- 527 62. Chatonnet P, Boidron JN, Dubourdieu D. Influence des conditions d'élevage et de sulfitage  
528 des vins rouges en barriques sur leur teneur en acide acétique et en ethyl-phenols1993. 277-98  
529 p.
- 530 63. Curtin C, Borneman A, Zeppel R, Cordente T, Kievit R, Chambers P, et al. AWRI: Staying a  
531 step ahead of 'Brett' Wine & Viticulture Journal. 2014;29(5):34-7.
- 532 64. Curtin C, Kennedy E, Henschke PA. Genotype-dependent sulphite tolerance of Australian  
533 *Dekkera (Brettanomyces) bruxellensis* wine isolates. Lett Appl Microbiol. 2012;55(1):56-61. doi:  
534 10.1111/j.1472-765X.2012.03257.x.

535

536



## 537 **Supporting information**

538 **S1 Table. Details of the 1411 strains of *Brettanomyces bruxellensis* used in this study.**

## A– European regions/countries

bioRxiv preprint doi: <https://doi.org/10.1101/763441>; this version posted September 9, 2019. The copyright holder for this preprint (which was not certified by peer review) is the author/funder, who has granted bioRxiv a license to display the preprint in perpetuity. It is made available under aCC-BY 4.0 International license.

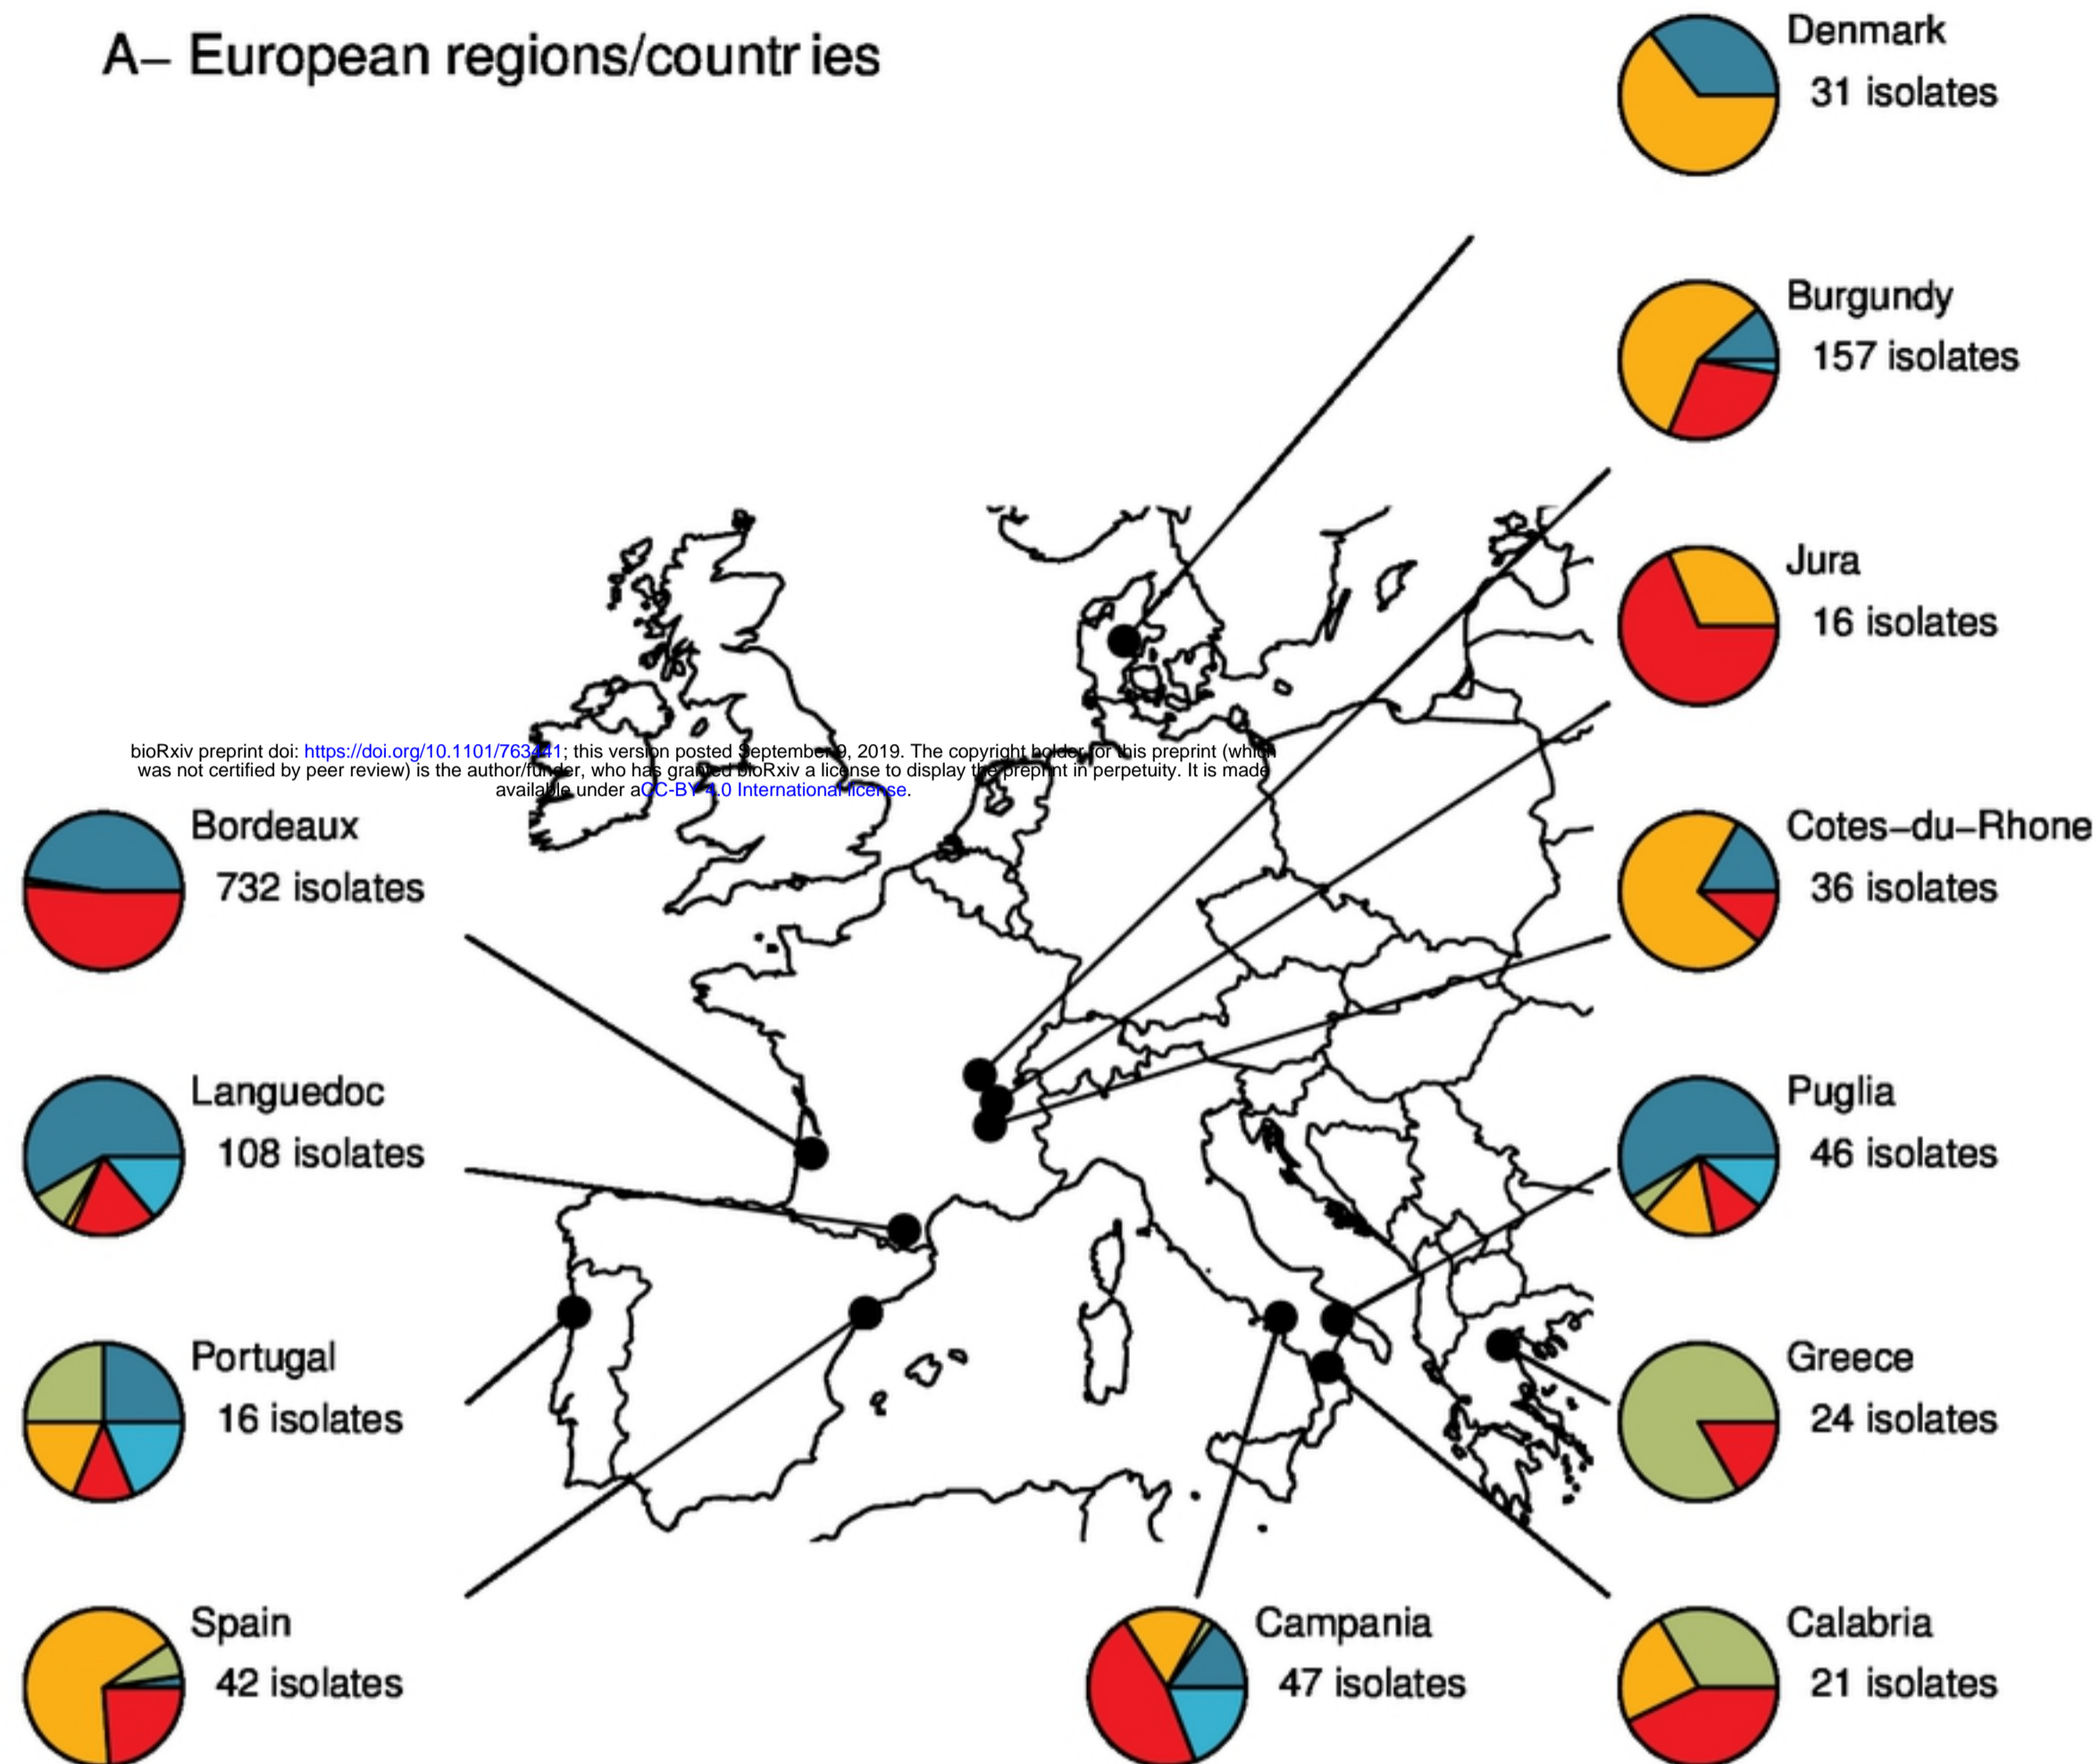

## B– Non-European countries

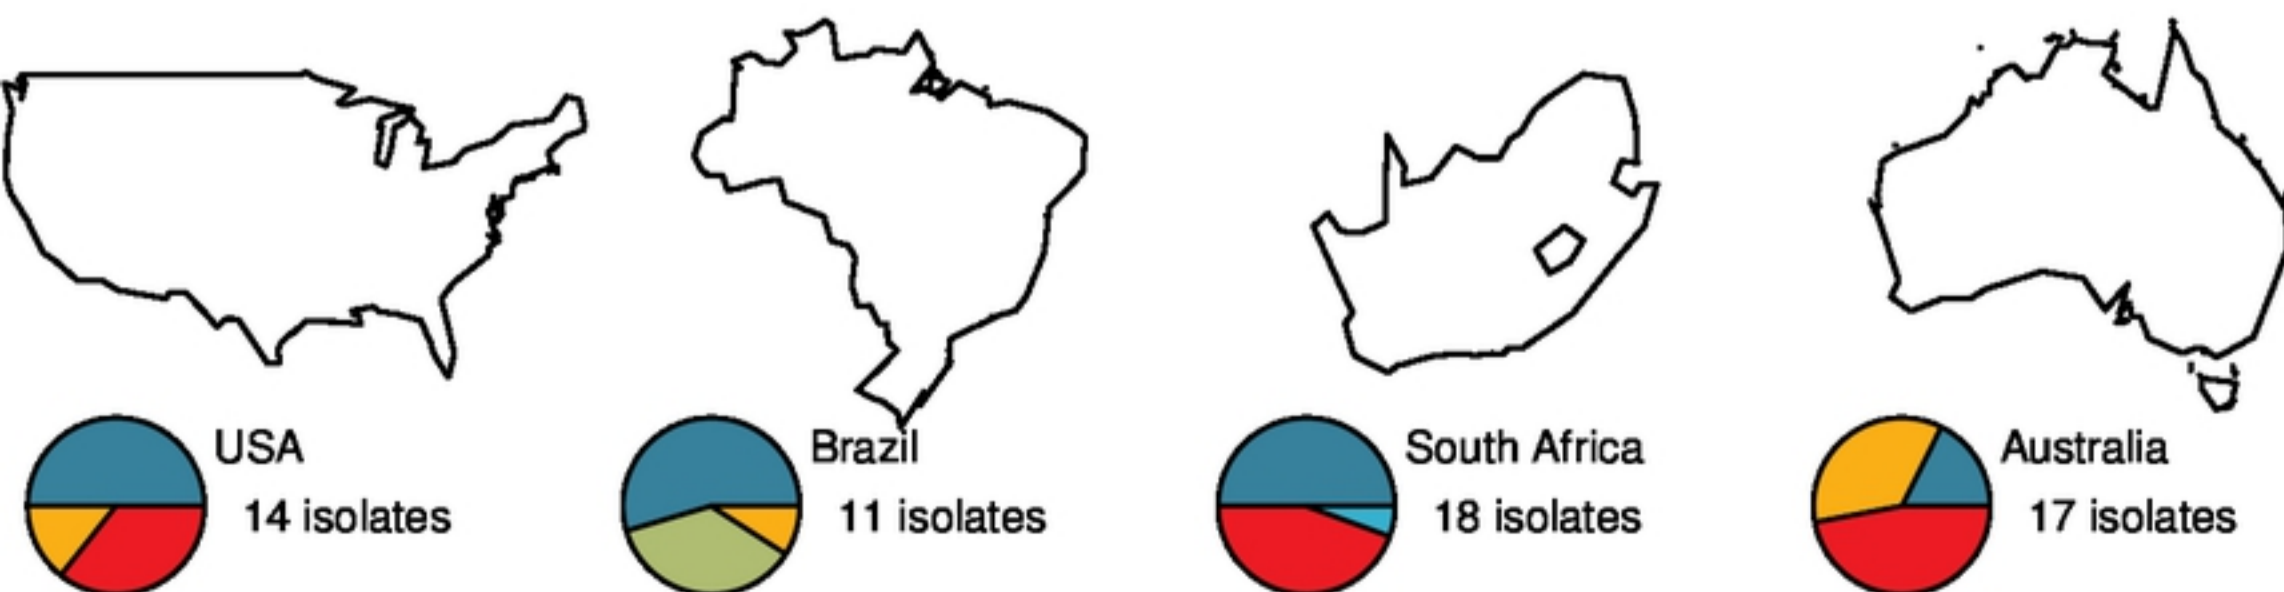

Figure 2

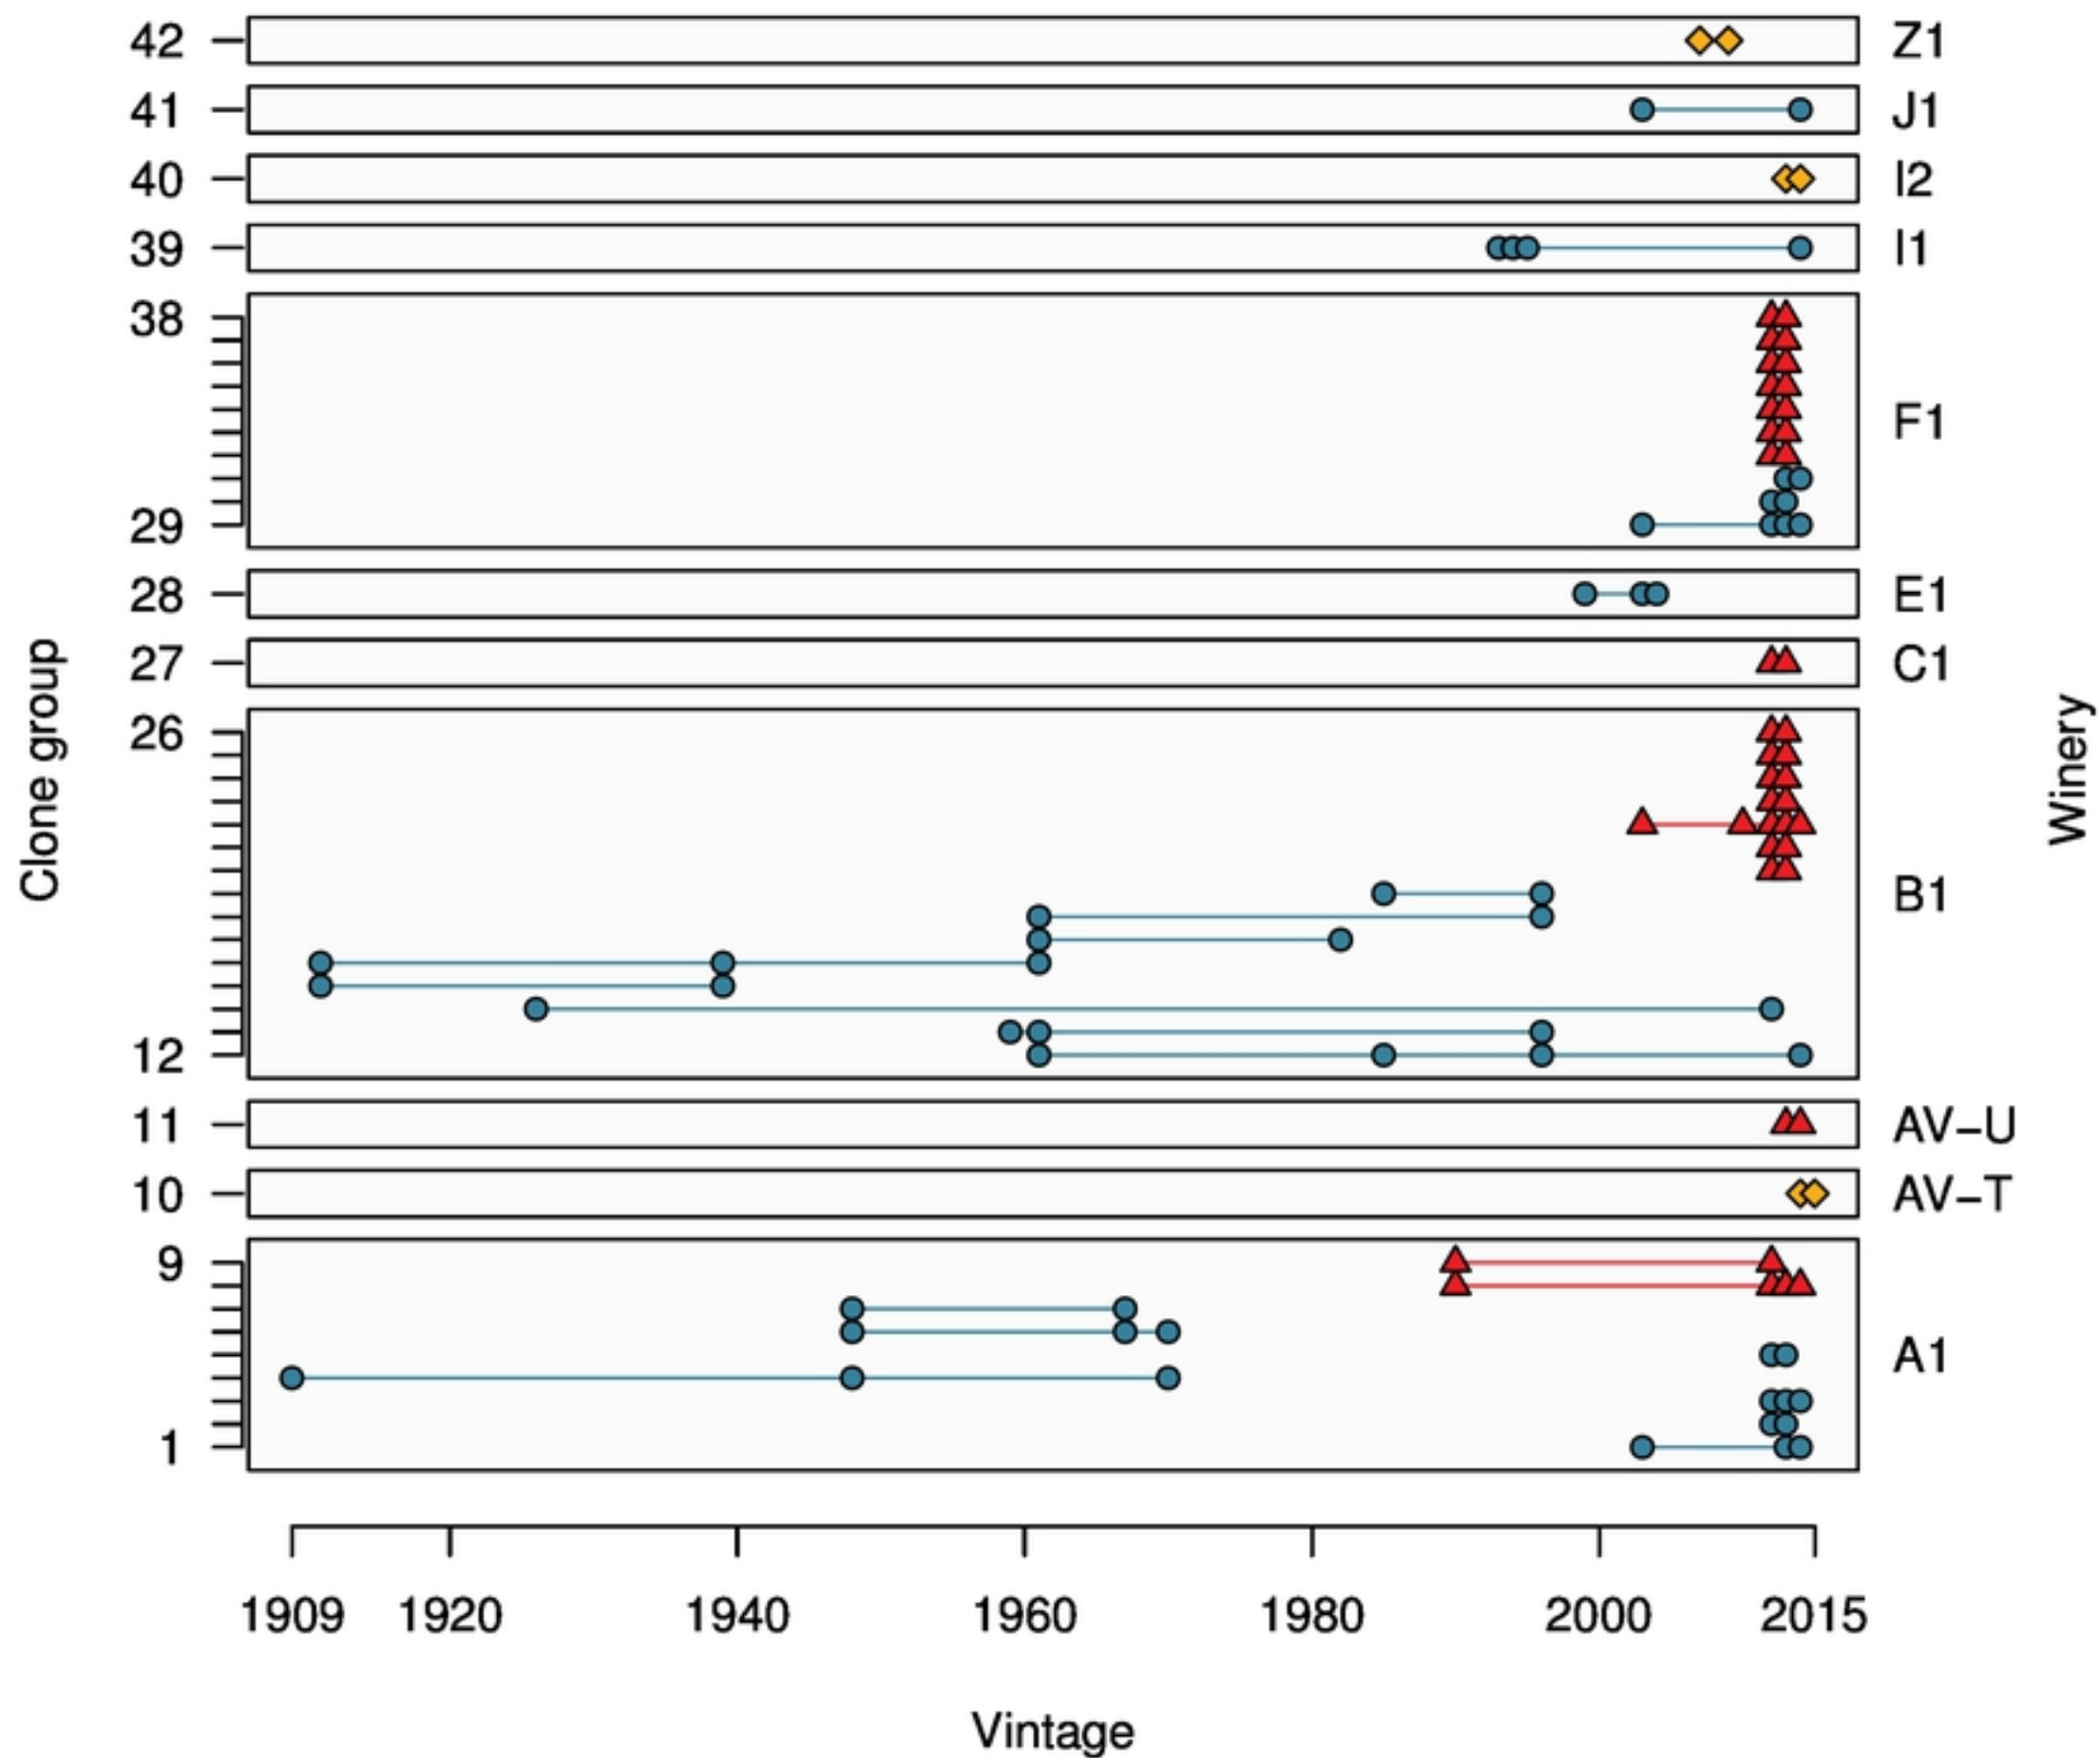

Figure 4

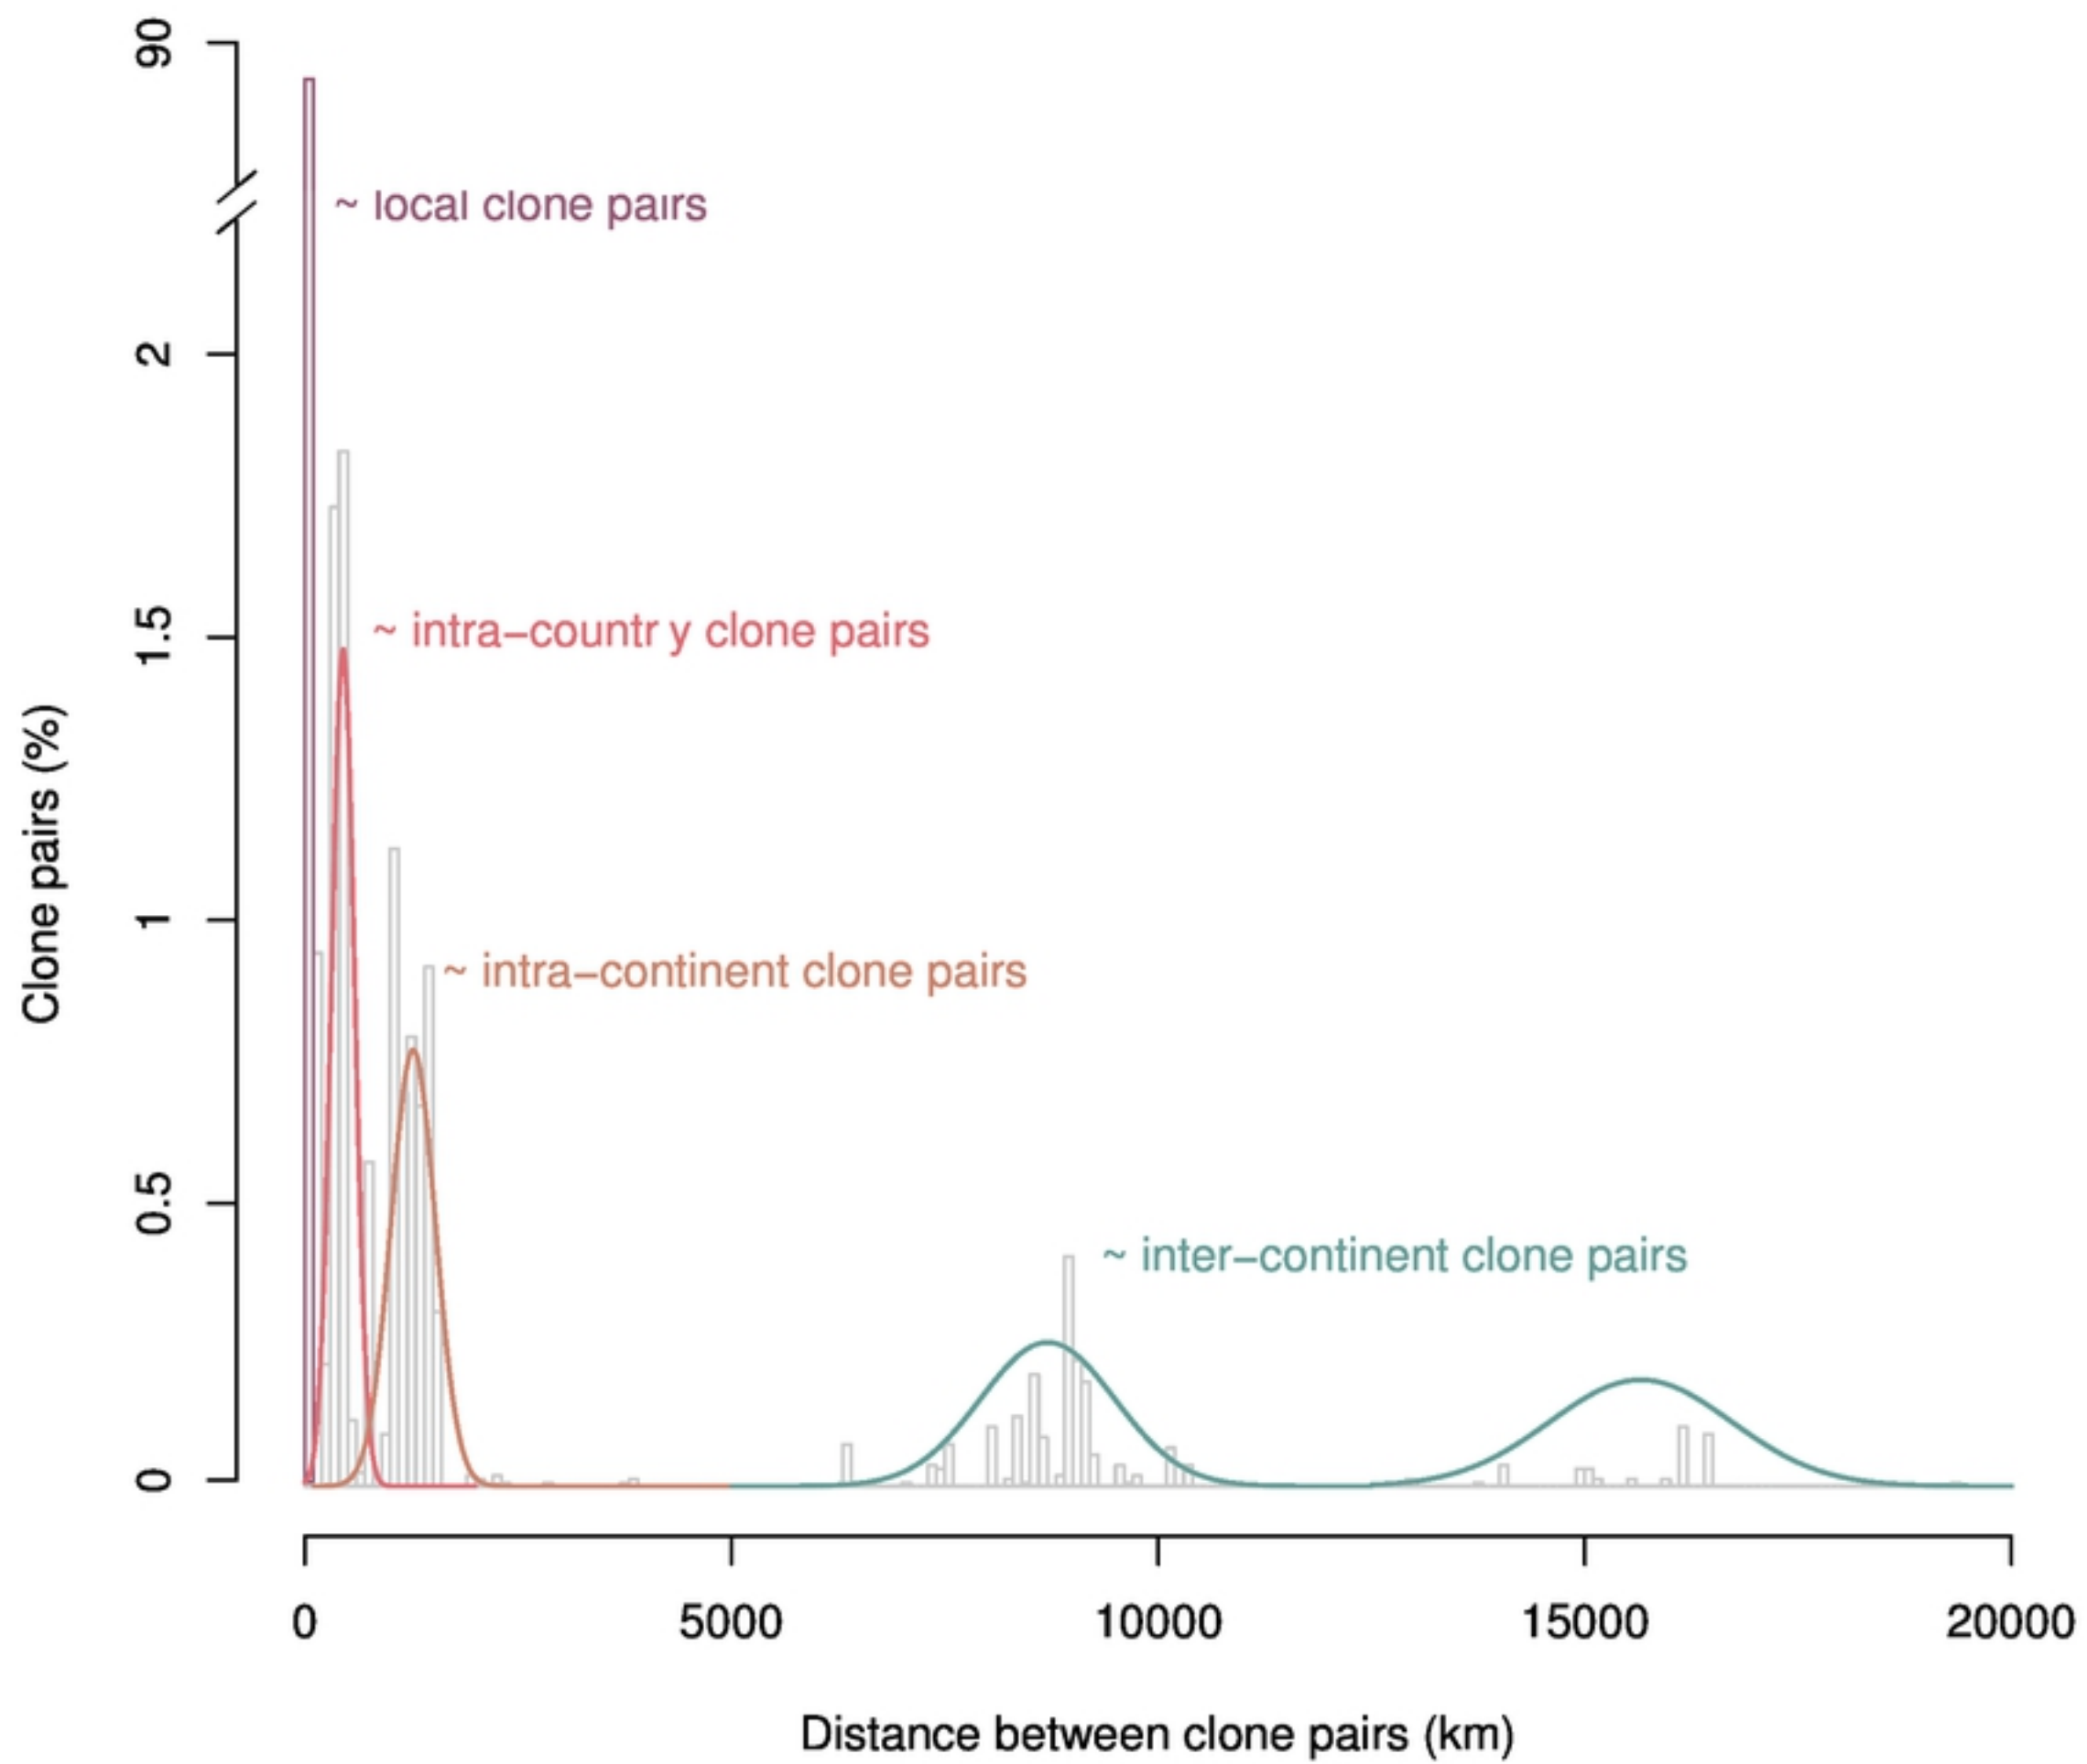

Figure 6

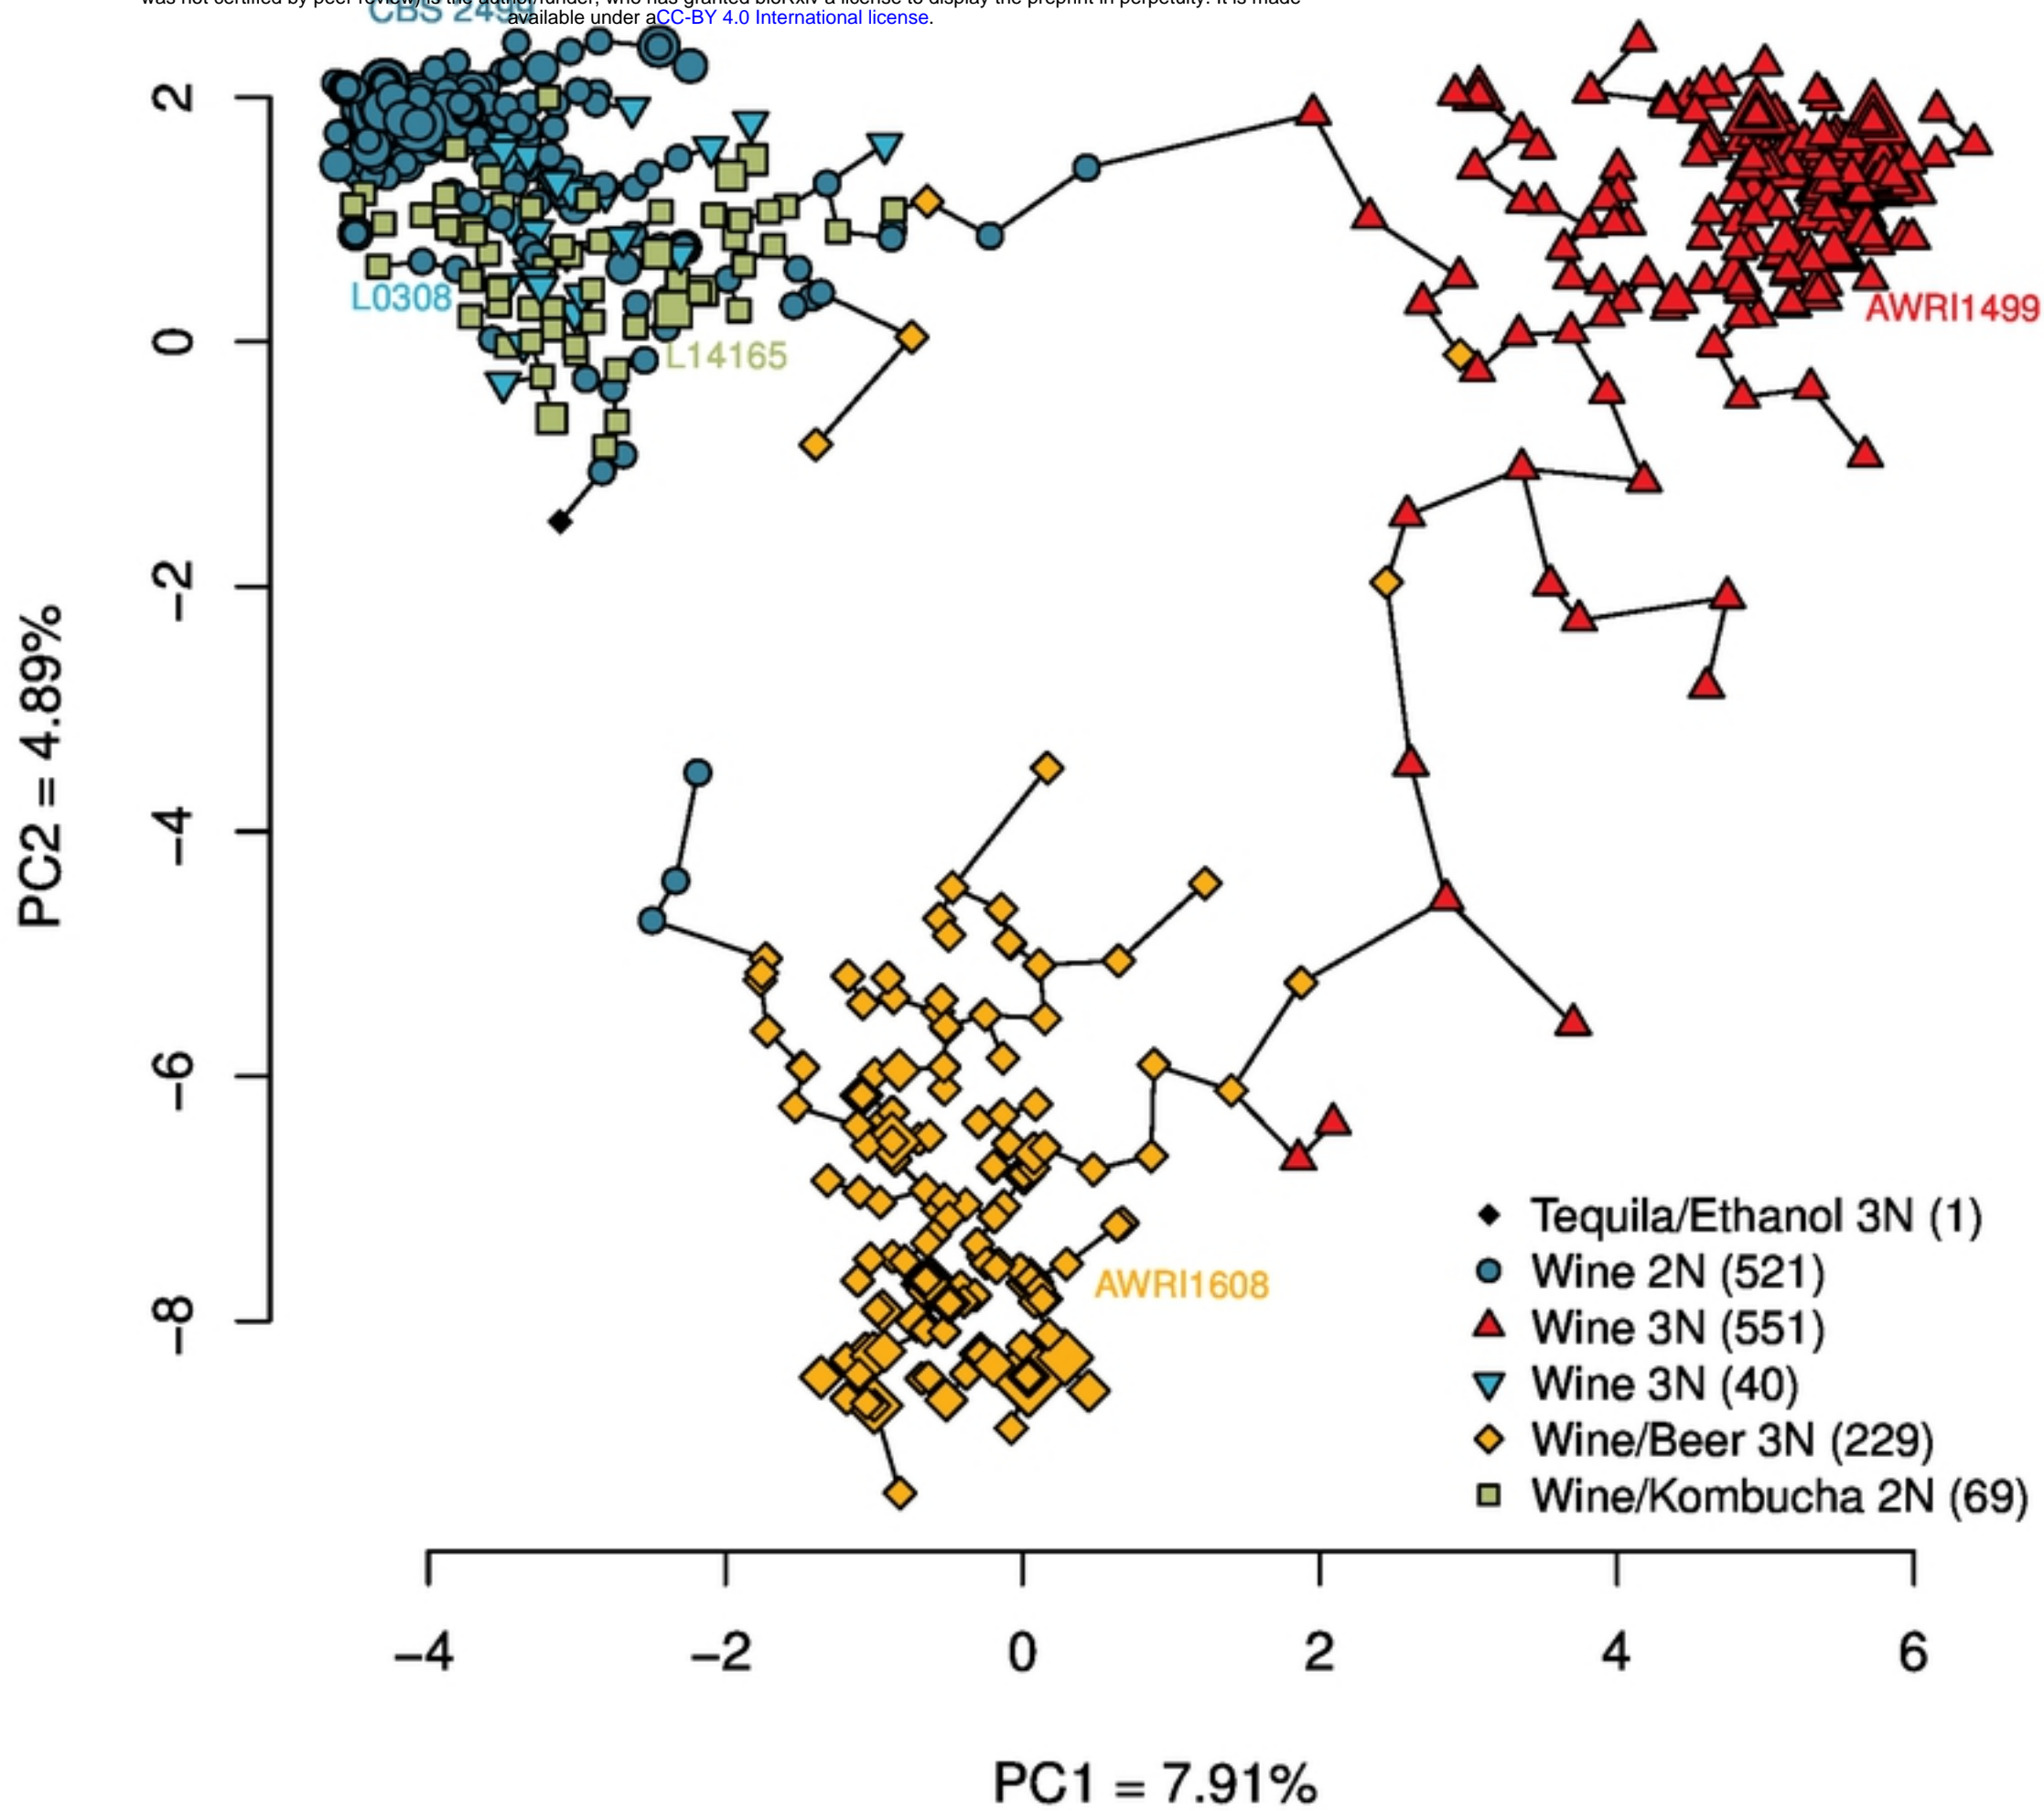

Figure 1

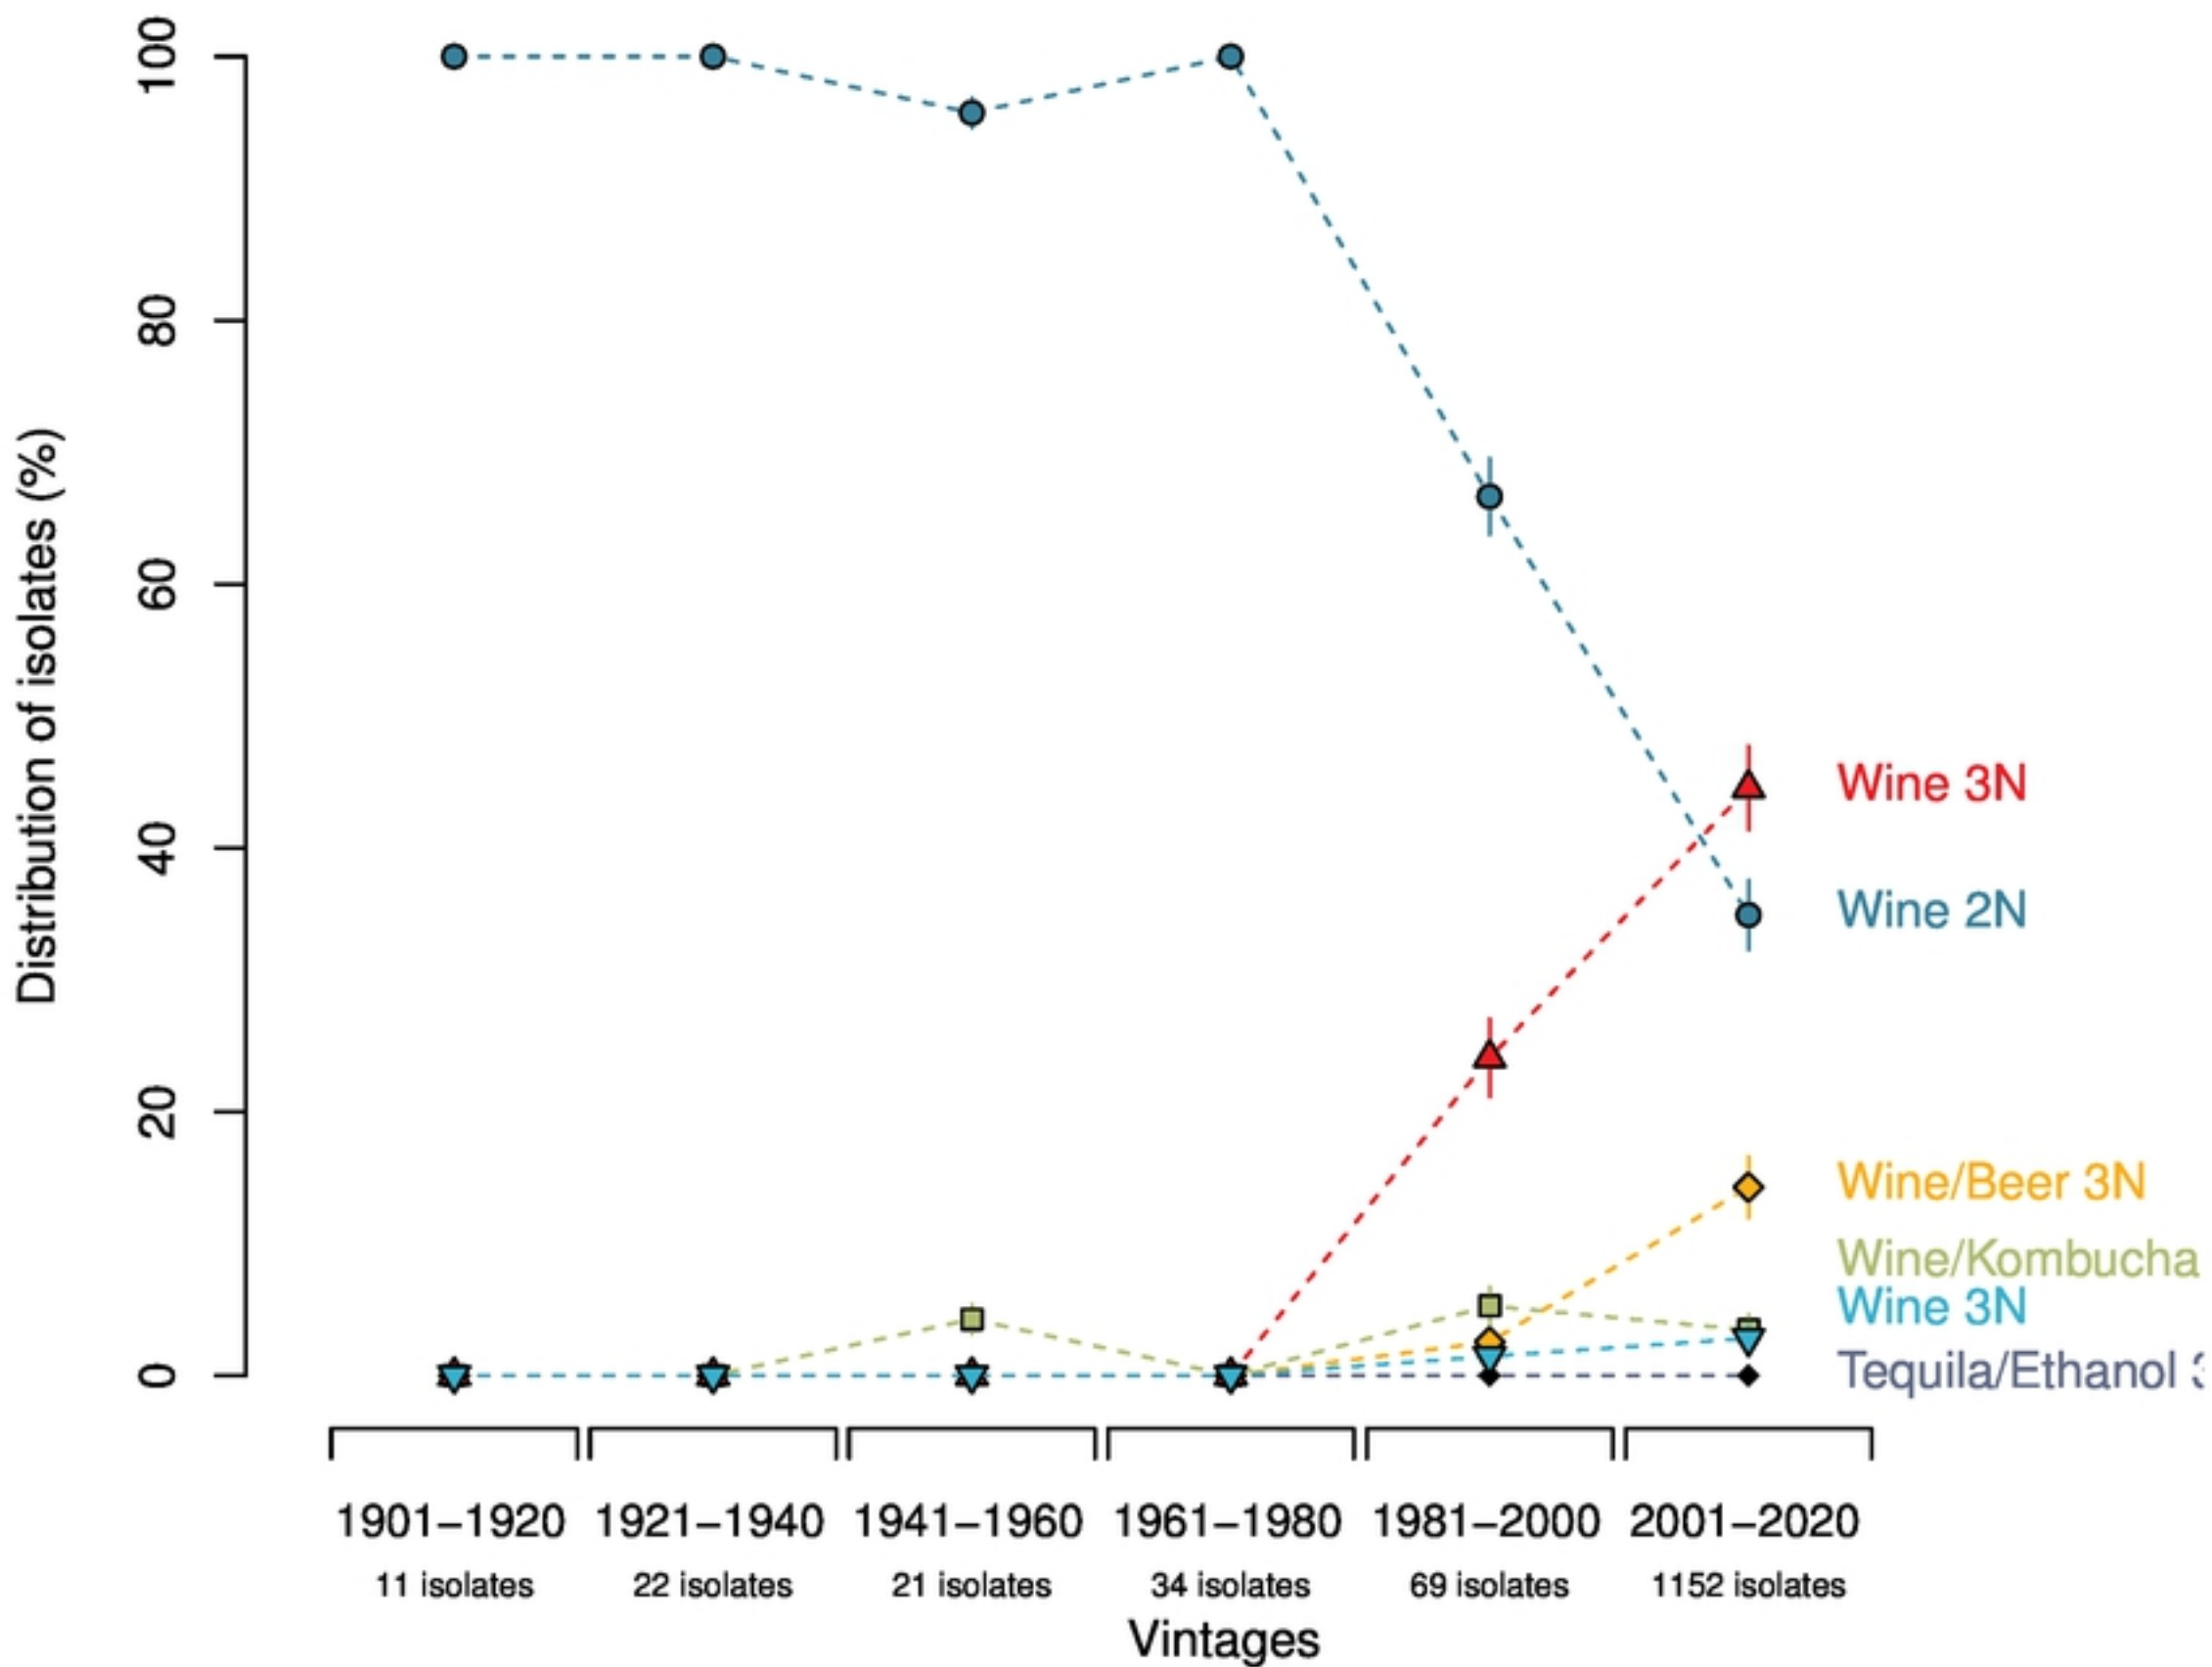

Figure 3

A

Wine 2N  
67 16  
Wine/Kombucha 2N  
72

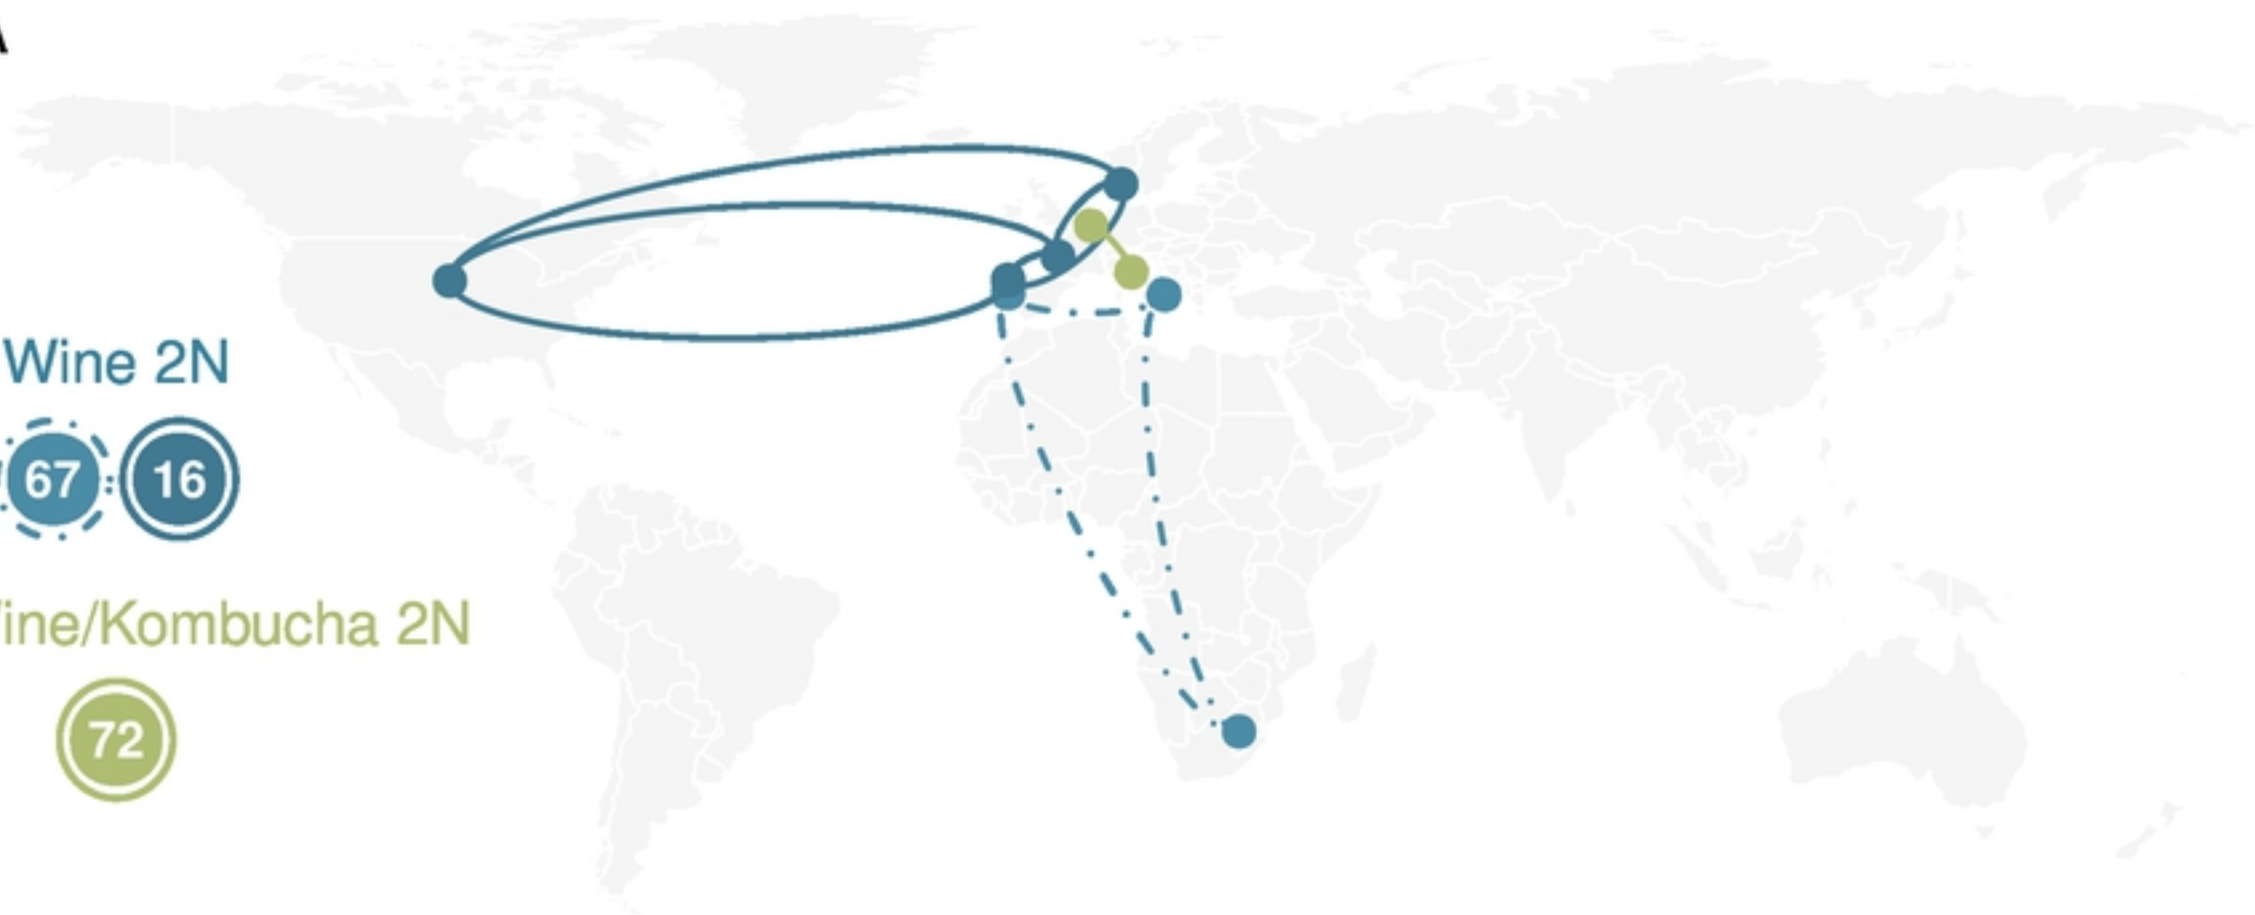

B

Wine 3N  
47 35 24  
Wine/Beer 3N  
2

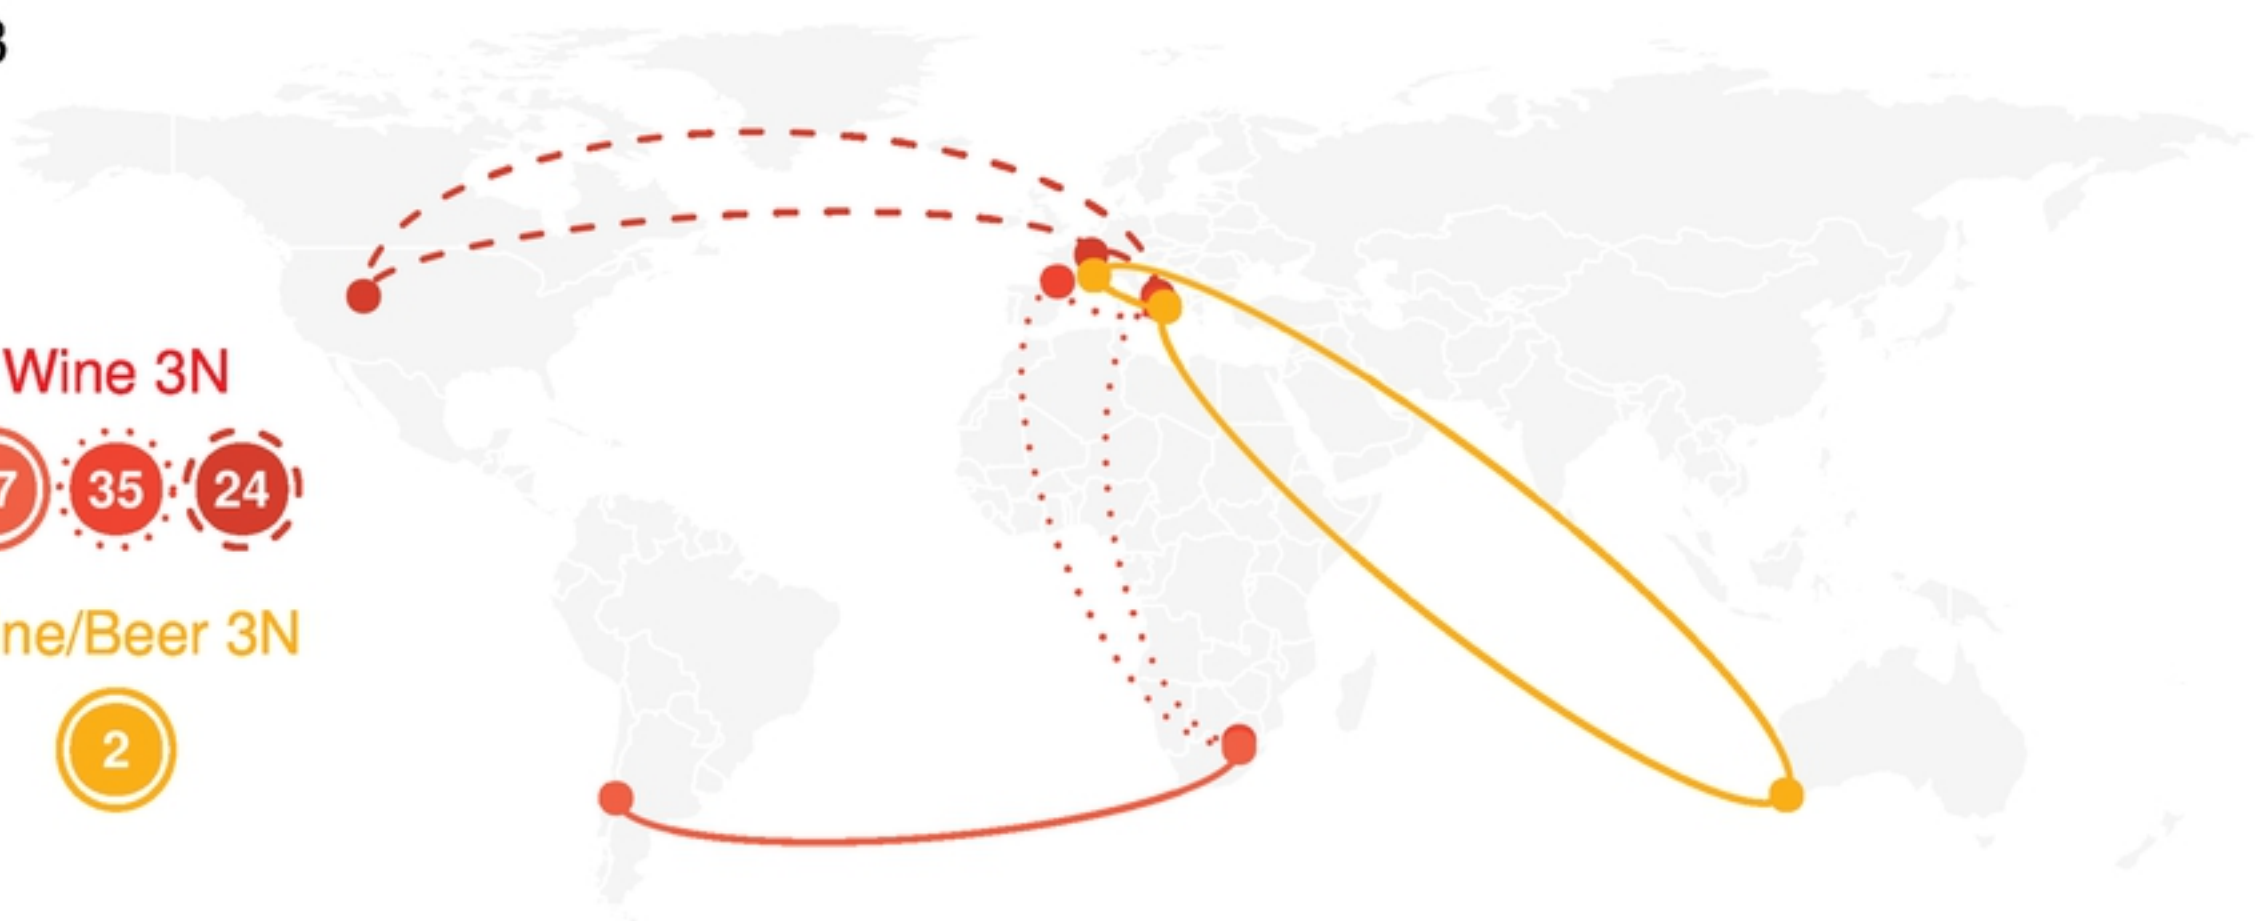

Figure 5
